1           **The potential cost-effectiveness of**  
2           **controlling dengue in Indonesia using**  
3           ***wMel Wolbachia* released at scale: a**  
4           **modelling study**

5  
6   Oliver J. Brady,<sup>1,2\*</sup> Dinar D. Kharisma,<sup>3</sup> Nandyan N. Wilastonegoro,<sup>4</sup> Kathleen M. O'Reilly,<sup>1,5</sup>  
7   Emilie Hendricx,<sup>1,2</sup> Leonardo S. Bastos,<sup>1,2</sup> Laith Yakob,<sup>1,5</sup> Donald S. Shepard<sup>3</sup>

8  
9  
10 **Affiliations**

11  
12 <sup>1</sup> Centre for the Mathematical Modelling of Infectious Diseases, London School of Hygiene &  
13 Tropical Medicine, London, UK

14 <sup>2</sup> Department of Infectious Disease Epidemiology, Faculty of Epidemiology and Population  
15 Health, London School of Hygiene & Tropical Medicine, London, UK

16 <sup>3</sup> Heller School for Social Management and Policy, Brandeis University, Waltham, MA USA

17 <sup>4</sup> Faculty of Medicine, Public Health and Nursing, Gadjah Mada University, Yogyakarta,  
18 Indonesia

19 <sup>5</sup> Department of Disease Control, Faculty of Infectious Tropical Diseases, London School of  
20 Hygiene & Tropical Medicine, London, UK

21  
22  
23 \* Correspondence to [oliver.brady@lshtm.ac.uk](mailto:oliver.brady@lshtm.ac.uk)

## 28 Abstract

### 29 Background

30 Release of virus-blocking *Wolbachia* infected mosquitoes is an emerging disease control  
31 strategy that aims to control dengue and other arboviral infections. Early entomological  
32 data and modelling analyses have suggested promising outcomes and *wMel Wolbachia*  
33 releases are now ongoing or planned in 12 countries. To help inform potential scale-up  
34 beyond single city releases, we assessed this technology's cost-effectiveness under different  
35 programmatic options.

36

### 37 Methods

38 Using costing data from existing *Wolbachia* releases, previous estimates of *Wolbachia*  
39 effectiveness, and a spatially-explicit model of release and surveillance requirements, we  
40 predicted the costs and effectiveness of the on-going programme in Yogyakarta City and  
41 three new hypothetical programmes in Yogyakarta Special Autonomous Region, Jakarta and  
42 Bali.

43

### 44 Results

45 We predicted *Wolbachia* to be a highly cost-effective intervention when deployed in high  
46 density urban areas with gross cost-effectiveness ratios below \$1,500 per DALY averted.  
47 When offsets from the health system and societal perspective were included, such  
48 programmes even became cost saving over 10-year time horizons with favourable benefit-  
49 cost ratios of 1.35 to 3.40. Sequencing *Wolbachia* releases over ten years could reduce  
50 programme costs by approximately 38% compared to simultaneous releases everywhere,  
51 but also delays the benefits. Even if unexpected challenges occurred during deployment,  
52 such as emergence of resistance in the medium-term or low effective coverage, *Wolbachia*  
53 would remain a cost saving intervention.

54

55 **Conclusions**

56 *Wolbachia* releases in high density urban areas is expected to be highly cost-effective and  
57 could potentially be the first cost saving intervention for dengue. Sites with strong public  
58 health infrastructure, fiscal capacity, and community support should be prioritized.

59

60 **Keywords**

61 dengue; wolbachia; mosquito; indonesia; cost-effectiveness-analysis; maps; spatial; model;  
62 policy

63

## 64 Background

65 The mosquito species *Aedes aegypti* and *Ae. albopictus* are responsible for transmitting a  
66 range of growing global arboviral infections. Existing vector control tools alone have been  
67 unable to sustainably control these mosquito species or the diseases they transmit [1], and  
68 a range of novel technologies are under development [2].

69 One such novel intervention is release of mosquitoes infected with the intracellular  
70 bacterium *Wolbachia* [3]. Mosquitoes infected with *Wolbachia* are i) less likely to  
71 disseminate dengue, chikungunya, Zika and yellow fever viruses and thus are less likely to  
72 become infectious [3–5] and ii) can suppress or replace the natural mosquito population  
73 due to fatal cytoplasmic incompatibility among *Wolbachia*-wild type mating pairs [3].  
74 *Wolbachia* can, therefore, be used to either replace the existing mosquito population with a  
75 lower competence phenotype by releasing females or suppress existing population by  
76 releasing males. To date, 13 countries have ongoing replacement programmes at various  
77 stages of development, with 12 through the World Mosquito Programme (WMP,  
78 [www.worldmosquitoprogram.org](http://www.worldmosquitoprogram.org)) and an independent program in Malaysia [6]. Meanwhile  
79 China [7], Singapore [8], and the USA [9] have chosen to use suppression-based  
80 programmes due to perceived greater compatibility with their existing intensive and long  
81 term efforts to suppress mosquito populations.

82 Replacement programmes with *Wolbachia* entail substantial initial investments to establish  
83 *Wolbachia* in the mosquito population through intensive releases at the beginning of the  
84 programme but potentially offer considerable long-term benefits. The replacement  
85 approach contrasts with suppression strategies with *Wolbachia*, sterile insect techniques or  
86 conventional vector control tools, which likely need ongoing application. Both approaches  
87 are in the early stages of gathering entomological and epidemiological evidence of  
88 effectiveness [2]. Among these novel methods, replacement with *wMel Wolbachia* has,  
89 arguably, the most developed evidence base so far [10] because it has demonstrated  
90 replacement in multiple sites [11, 12], durability of unaltered replacement since 2011 in  
91 Townsville, Australia [13], reductions in reported dengue cases in observational study  
92 designs in five countries [14], and a cluster randomised trial is currently underway in  
93 Yogyakarta, Indonesia [15] with epidemiological outcome results expected in late 2020.

94 Recent events including the 2015-7 Latin American Zika outbreak and the record breaking  
95 2019 global dengue outbreak have hastened the adoption of novel *Aedes* control tools.  
96 Given the acute need to make decisions on adoption, mathematical models can be used to  
97 predict impact in different areas long before field data become available [16, 17]. Pairing  
98 these epidemiological predictions with intervention cost and cost-of-illness data enable  
99 cost-effectiveness calculations that can inform decisions on *Wolbachia* scale up.

100 One such priority setting is Indonesia, where city-wide *Wolbachia* releases are already  
101 planned in Yogyakarta City after the randomised trial [15]. In 2016 Indonesia launched its  
102 “Healthy Indonesia Program with Family Approach”, which includes cleaning the  
103 environment and addressing communicable diseases, including malaria and dengue [18].  
104 This program provides encouragement and some national funding. In addition, in the  
105 Yogyakarta Special Autonomous Region (SAR), the governor has confirmed his support for  
106 novel technologies, including *Wolbachia* [19], suggesting support for expansion beyond  
107 Yogyakarta City.

108 Cost effectiveness analyses (CEAs) have proved instrumental for early adoption of a number  
109 of interventions, including for *Aedes*-borne pathogens. Fitzpatrick et al. estimated that,  
110 assuming they were 70-90% effective, conventional *Aedes* suppression tools would achieve  
111 cost-effectiveness ratios of between \$679-\$1331 per Disability-Adjusted Life Year (DALY)  
112 averted (2013 USD) [20]. The recently developed dengue vaccine, Dengvaxia<sup>®</sup>, also included  
113 model-predicted CEA as part of its feasibility assessment, with predictions without sero-  
114 testing of \$11-44 per DALY averted (2014 USD) [21]. Dengvaxia<sup>®</sup> has also been estimated to  
115 be highly cost effective (\$1,800 per DALY, health systems perspective) or cost saving (\$-  
116 1,800 per DALY, societal perspective) under the WHO’s modified test-and-vaccinate  
117 recommendation, however with more limited overall impact (14.3% reduction in  
118 hospitalisation) [22].

119 Here we use existing *Wolbachia* release cost and programme data to build a model that  
120 predicts cost of release in different environments. We merge the cost predictions with  
121 previously published estimates of *Wolbachia* effectiveness [16] to assess cost-effectiveness  
122 and its sensitivity to different programmatic options for consideration at the next stage of  
123 scale up of this technology.

124

## 125 Methods

### 126 Phases of the programme

127 In this analysis we conceptually divide a potential *Wolbachia* replacement programme in a  
128 given city into four phases based on previous WMP operations. We do not consider the  
129 additional costs of obtaining regulatory approval in Indonesia as *Wolbachia* release has  
130 already been approved by the local Yogyakarta SAR government and the national  
131 government already has an active involvement in the project as part of the independent  
132 data monitoring committee. Phase 1 (“Setup”, 2 year duration) includes establishing  
133 insectaries, laboratories, site offices, local regulatory approval, hiring staff and planning and  
134 administering the programme and pre-release community engagement. Phase 2 (“Release”,  
135 1 year duration) involves release of *Wolbachia* mosquitoes over target areas applying the  
136 resources established during Phase 1. In Phase 3 (“short-term monitoring”, 3 years  
137 duration), ongoing surveillance of the mosquito and human population is conducted in the  
138 release area. Phase 4 (“long-term monitoring”, 7 years duration) entails reduced  
139 entomologic monitoring as the intervention proves its reliability.

140 In the existing program in Yogyakarta City, programme setup took four years; however, this  
141 included gaining national approval, design of the cluster randomised trial, all Phase 1  
142 activities and release in half the city. We anticipate faster setup times of subsequent  
143 programmes elsewhere in Indonesia due to the experiences and approvals gained in  
144 Yogyakarta City.

145 For the main analysis we consider two speed scenarios: i) an “accelerated” scenario, with  
146 every area conducting Phases 1-4 simultaneously and independently (total programme  
147 length 13 years), and ii) a “sequenced” scenario, in which Phase 2 releases are spread over  
148 10 years with certain centralised resources moved or re-utilized across different locations  
149 (total programme length 20 years, Appendix page 7).

### 150 Costing *Wolbachia* releases (Phases 1 and 2)

151 We hypothesised that the main determinants of the cost of releasing *Wolbachia* per square  
152 kilometre (km) were directly or indirectly related to: i) the human population density in the  
153 release area, ii) release material (adult or egg mosquitoes), iii) local cost of labour (as  
154 measured by country Gross Domestic Product adjusted for Purchasing Power Parity (GDP  
155 PPP)[23]) and iv) phase of the programme. Previous *Wolbachia* releases have shown that

156 higher human density areas require higher mosquito release numbers per unit area because  
157 they typically have higher natural mosquito population sizes, hence raising costs [24].  
158 Transportation costs of *Wolbachia*-infected mosquito eggs are lower than for adult releases  
159 because they can be distributed by the postal system and because the community can  
160 undertake releases; however, this can also increase community engagement costs. Adult  
161 releases require specific equipment and personnel to drive around the target area and  
162 conduct releases at pre-specified sites, but can potentially be achieved more quickly.

163 Data were extracted from WMP budgets for releases in Indonesia, Colombia, Sri Lanka,  
164 Australia and Vanuatu (Appendix page 1). These data were used to fit a generalised linear  
165 regression model between cost per km<sup>2</sup> of release area and the above covariates (Appendix  
166 page 2).

#### 167 Costing long-term surveillance (Phases 3 and 4)

168 Our estimates of the long-term monitoring costs of a *Wolbachia* programme (Phase 3 and 4)  
169 build on a detailed budget analysis developed by the WMP for Phase 2 of the programme in  
170 Yogyakarta City. This includes a gradual reduction in monitoring intensity with  
171 corresponding budget reductions (Appendix page 7).

#### 172 Cost of dengue illness averted

173 We obtain current fine-scale (5km x 5km) estimates of the current case burden of dengue in  
174 Indonesia and the economic cost per case in different treatment settings and from different  
175 payer perspectives from recent parallel studies. [16, 25] These maps of burden were  
176 downscaled to 100m x 100m spatial resolution to match the resolution of population  
177 datasets using bilinear interpolation.

#### 178 Candidate release sites

179 In this analysis we produce estimates for four candidate sites. (1) Yogyakarta City, (2)  
180 remaining areas in Yogyakarta SAR, (3) most of the special capital region of Jakarta  
181 (excluding Kepulauan Seribu [Thousand Islands] Regency), and (4) the island of Bali.

182 We chose this focus based on a combination of political, economic, and epidemiologic  
183 considerations. The Yogyakarta City trial carried an ethical and political expectation to  
184 assess expanding releases across the rest of Yogyakarta City and the remainder of the SAR.

185 The other two candidate sites, Jakarta and Bali, are two of the country's most important

186 economic regions as commercial and tourism hubs. In epidemiologic terms, high density  
187 cities, such as Jakarta and Denpasar, Bali have a disproportionately high concentration of  
188 national dengue burden [16] and island-wide releases are likely to minimise the risk of re-  
189 introduction of native *Ae. aegypti* populations.

190 Within each of these sites, not every area is expected to be covered by *Wolbachia*. We  
191 consider only areas with a human population density of at least 1,000 people per km<sup>2</sup> as  
192 eligible for *Wolbachia* releases. Previous WMP releases in Townsville and Cairns, Australia  
193 have proven the ability to establish *Wolbachia* in areas approaching 1,000 people per km<sup>2</sup>  
194 (Figure 1), but based on existing programme experience, lower population densities are  
195 likely to prove prohibitive to natural mosquito dispersal and may significantly increase the  
196 cost or lower persistence of *Wolbachia* mosquitoes.

#### 197 Time horizon, acquisition of benefits and discounting

198 As *Wolbachia* is an early stage technology, we take a conservative approach to our  
199 calculation of cost-effectiveness. We only assume benefits of *Wolbachia* persist for 10 years  
200 post completion of releases in the target area (i.e. benefits only accumulated in Phases 3-4,  
201 Appendix page 7) based on the duration of continued persistence of *Wolbachia* releases in  
202 northern Queensland since 2011 [26].

203 We assumed that the number of cases averted would be the same each year. All costs and  
204 benefits were discounted at 3% per annum [27], calculated at the end of each year. The cost  
205 of the programme was predicted using population data at 100m x 100m resolution from  
206 Worldpop [28] assuming a programme using egg releases with Indonesia's national-2018  
207 per capita GDP (PPP, \$12,378).

208 Two measures of cost-effectiveness are shown. First, from a health systems perspective  
209 (gross cost-effectiveness), where the investment cost of the programme is divided by the  
210 number of DALYs averted over the 10 years post deployment (discounted at 3% per year).  
211 Second, from a societal perspective (net cost-effectiveness), where offsets to direct medical  
212 treatment costs are first deducted from the programme investment costs. Benefit-cost  
213 ratios are also calculated from health systems and societal perspectives separately.

#### 214 Sensitivity analyses

215 To assess the sensitivity of our predictions to uncertainties in various inputs to our model  
216 we performed a univariate sensitivity analysis based on the 2.5% and 97.5% estimates for



217 each of the following parameters: i) case burden, ii) *Wolbachia* effectiveness, iii) cost of  
218 *Wolbachia* releases, and iv) cost per episode of dengue illness. In addition, we also  
219 examined the sensitivity of cost-effectiveness to several hypothesised environmental and  
220 genetic challenges and changes that may occur as a consequence of *Wolbachia* introduction  
221 [29]. These include i) low coverage (50% vs baseline 100% coverage), ii) releases that are  
222 initially uncompetitive with wild-type mosquito populations and iii) emergence of resistance  
223 (after 5 years). The cost-effectiveness of programme modifications to address these  
224 challenges are also assessed. Furthermore, we predict the cost-effectiveness of future cost-  
225 saving adaptations of the program including iv) reliance on passive disease surveillance (as  
226 opposed to continued entomological surveillance in Phase 4 of the programme) and v)  
227 generic innovations, efficiencies and economies of scale that reduce the cost base of the  
228 programme by 50%. Further details on rationale for these scenarios and their  
229 parameterisation are available in the Appendix page 3. All analyses were performed in R  
230 version 3.6.1. with all code publicly available in the following GitHub repository  
231 ([https://github.com/obradu/Wolbachia\\_CE/tree/V1](https://github.com/obradu/Wolbachia_CE/tree/V1)).

## 232 Results

### 233 *Wolbachia* programme costs

234 The results of our model to predict the cost of releasing *Wolbachia* mosquitoes in new areas  
235 using existing programme budgets is shown in Figure 1. This model identified human  
236 population density and programme phase as significant covariates of programme cost per  
237 km<sup>2</sup> of release area ( $p = 0.003$  and  $p = 0.026$  respectively, two-sided t-test, Appendix page  
238 2). Release material (eggs or adult mosquitoes) or national GDP per capita (as a proxy for  
239 local labour costs) were not found to be significant ( $p = 0.98$  and  $0.31$  respectively) but were  
240 retained in the final model due to limited within site variance. Models with the response  
241 variable of cost per km<sup>2</sup> gave superior cost data fit to models with a response variable of  
242 cost per person, so were used throughout (Appendix page 2).

243 Each of the four candidate sites differs in size and human population density, comprising a  
244 small city (Yogyakarta City), a large city (Jakarta) and two moderate-size urban-rural mixes  
245 (Yogyakarta SAR and Bali, Table 1). Because we assume *Wolbachia* to be suitable only in  
246 areas with density greater than 1,000 people per km<sup>2</sup>, only 24.8% and 14.9% of the land  
247 area in Yogyakarta SAR and Bali are eligible for *Wolbachia* release, compared to 100% in  
248 urban areas, although these areas do still contain the majority of people (Table 1).

249 The estimated cost of an accelerated (10-year) *Wolbachia* programme ranges from \$5.8  
250 million in Yogyakarta City to \$133.3 million in Jakarta (present value 2018 USD, Table 1).  
251 While the urban sites have a smaller release area than their urban-rural mix counterparts,  
252 the cost per km<sup>2</sup> of releasing in high density areas is much higher (Figure 1), however,  
253 because more people are covered, urban areas lead to more favourable cost per person  
254 covered (~\$12 vs \$14-21, Table 1).

255 Conducting releases over a longer sequenced programme (total programme length 20-year  
256 vs 13-year) can reduce overall costs by 11%-38% (Table 1), but also delays benefits (Figure  
257 2). In this analysis we assume 10 years of benefits for each area in which *Wolbachia*  
258 mosquitoes are released because there is currently substantial uncertainty over costs and  
259 effectiveness beyond 10 years (Figure 2). Should *Wolbachia* prove more durable than this,  
260 accelerated programmes and their quicker acquisition of benefits would become more

261 preferable relative to sequenced programmes, however the challenges of their greater  
262 upfront costs would remain.

263

## 264 Benefits

265 Combining health systems costs and societal costs (lost wages due to work absences  
266 attributable to sickness and the value of life lost due to premature death), Indonesia's  
267 national economic burden of dengue in 2017 has been estimated at \$681.26 million, [25]  
268 with costs due to hospitalised non-fatal cases (44.7%), fatal cases (44.3%), ambulatory non-  
269 fatal cases (5.7%) and non-medical cases (5.3%). [25] We predict substantial reductions in  
270 dengue case and economic burden in all sites. As estimated in previous work, [16] long-term  
271 average percentage reductions are likely to be highest in low transmission intensity  
272 environments (87.2% reduction in Yogyakarta SAR vs 65.7% reduction in Jakarta, Table 2).  
273 However, because *Wolbachia* programmes can achieve higher coverage in dense high  
274 transmission intensity cities, the percentage reduction across the whole site area becomes  
275 more favourable (65.7% in Jakarta vs 59.1% in Yogyakarta SAR and 52.4% in Bali). Medium  
276 transmission intensity high density cities, such as Yogyakarta City are likely to see the  
277 highest percentage reduction and may even see elimination (94.4%, 95% uncertainty  
278 interval [95UI] 36.5%-100%).

279 The annual cost savings of averting these cases are substantial, ranging from \$980,000 (95UI  
280 \$350,000 – \$2,170,000) in Yogyakarta City to \$27.1 million (95UI \$10.58 – \$49.35 million) in  
281 Jakarta. As estimated in previous work, [25] these cost savings are divided approximately  
282 equally between medical costs and societal costs.

283

## 284 Cost-effectiveness

285 Due to the heterogeneous nature of risk and cost, estimated cost-effectiveness values are  
286 spatially variable (Table 3, Figure 3). Generally, cost-effectiveness is most favourable in high  
287 density urban environments with gross cost-effectiveness (cost of averted disease cases not  
288 included) reaching as favourable as \$1,100 per DALY averted in specific places (Figure 3C),  
289 especially in a sequenced programme (Table 3). Although the overall gross cost-  
290 effectiveness of the projected programmes in Yogyakarta SAR and Bali are less favourable  
291 than their urban counterparts (Table 3), there are many sub-areas within these sites where

292 *Wolbachia* programmes could have equally as favourable cost-effectiveness (Figure 3B and  
293 3D). This is most pronounced for the Yogyakarta SAR scenario where the surrounding urban  
294 areas of Sleman, Bantul and the isolated towns of Sentol and Wonosari are predicted to be  
295 highly cost effective (<\$1,700 / DALY) while many rural areas are less favourable. We even  
296 predict some of these towns in Yogyakarta SAR to be more cost effective than Yogyakarta  
297 City, however this result occurs only because we assume that the core resources (e.g.  
298 laboratory and rearing facilities) that have already been paid for and developed for the  
299 existing *Wolbachia* programme in Yogyakarta City can be reused for the surrounding areas  
300 in Yogyakarta SAR.

301 When the health sector and societal costs of averted cases are deducted from the original  
302 programme investment, *Wolbachia* becomes a cost-saving intervention in cities and a highly  
303 cost-effective intervention elsewhere (Table 3 and Figure 4A). One dollar invested in  
304 *Wolbachia* can return between \$1.35 and \$3.40 (95UI \$0.17 – \$9.67) in medical and societal  
305 benefits depending on where the programme takes place (Figure 4A). In Jakarta, the  
306 medical benefits alone are predicted to outweigh the cost of investment in *Wolbachia*  
307 (Figure 4A).

308

### 309 **Sensitivity and uncertainty**

310 Our prediction that *Wolbachia* is cost saving is robust to a reasonable range of parameter  
311 values (Figure 4B). In univariate sensitivity analysis of the 2.5 and 97.5 percentiles of the  
312 true parameter value, only a low value of the baseline burden of dengue is sufficient to  
313 prevent *Wolbachia* from becoming cost saving, and even then the programme is still highly  
314 cost effective (\$1652 / DALY, Sequenced programme in Yogyakarta City, societal  
315 perspective). Parameters for cost of the programme, cost per case and efficacy of the  
316 intervention were less critical for overall cost-effectiveness than baseline burden due to the  
317 higher uncertainty in the true burden of dengue.

318 Programmes are even predicted to be cost saving if substantial challenges occur during  
319 deployment. If only 50% coverage were reached in the target area, resistance emerges after  
320 five years or released mosquitoes are uncompetitive with wild-type mosquitoes, benefit-  
321 cost ratios remain above 1 (Figure 4C, societal perspective). Furthermore, if these events do  
322 occur, cost-effectiveness of the programme can still be recovered by addressing these

323 threats (Figure 4C and Appendix page 4-6). As *Wolbachia* programmes become more proven  
324 over time it is expected that relaxed surveillance (relying on passive disease monitoring),  
325 innovations and economies of scale will reduce the cost of deployment. These have the  
326 potential to increase the benefit-cost ratio by as much as 47%, as long as they do not come  
327 at the expense of avoiding to detect more damaging failures of the programme (Figure 4C).

## 328 Discussion

329 Here we use existing cost data to build a programmatic model for *wMel Wolbachia*. By  
330 applying this model in Indonesia we show that this novel technology can be an economically  
331 advantageous intervention for dengue control and predict under what circumstances it  
332 might be most cost effective. Cost effectiveness of *Wolbachia* is predicted to be most  
333 favourable in dense cities where a high concentration of people and dengue incidence allow  
334 the high investment costs of *Wolbachia* to be quickly offset. In such areas, programmes can  
335 become cost saving with benefit to cost ratios of 1.35-3.40, which are robust to our choice  
336 of model parameters and difficulties in the programme. Finally, we show that *Wolbachia*  
337 can also be cost effective in suburban and rural areas, particularly if they can utilise  
338 programme infrastructure from nearby urban areas. This is particularly relevant for the  
339 existing *Wolbachia* programme in Yogyakarta City and suggests that expansion to nearby  
340 areas in Sleman and Bantul in Yogyakarta SAR should be considered.

341 Assessing the cost-effectiveness of novel rear and release vector control strategies is  
342 important because of their high upfront costs but potentially long-term benefits. This makes  
343 the cost-effectiveness dynamics of *wMel Wolbachia* more similar to mass vaccination than  
344 conventional vector control. Like vaccination, this makes cost-effectiveness of *Wolbachia*  
345 sensitive to the time horizon of the evaluation. *wMel Wolbachia* has been robustly  
346 established in Cairns, Australia since early 2011 [26], hence our assumed 10 year benefit  
347 time horizon. More research is required to understand the sustainability of *Wolbachia*  
348 replacement in dengue-endemic countries with more complex *Aedes* population genetics  
349 and higher virus and mosquito importation rates from outside areas [30].

350 A number of previous studies have attempted to estimate the cost-effectiveness of vector  
351 control interventions for dengue [20, 31–34]. The methods used tend to fall into one of two  
352 approaches: field trials or model-based assessments. Experimental and observational  
353 control trials have been used to estimate cost-effectiveness (per DALY averted) for larvicides  
354 in Cambodia (\$313) [31], community clear up campaigns (\$3,953) and ultra-low volume  
355 spraying (\$4,472) in Mexico [33] and an integrated package of vector control interventions  
356 in Sri Lanka (\$98) [34]. Short-term control trials with disease endpoints are likely to  
357 overestimate effectiveness due to the effects of herd immunity and may mean  
358 interventions delay rather than avert disease.

359 In response to this, model-based cost-effectiveness evaluations can be used to give a more  
360 accurate estimate of long-term effectiveness of a particular intervention. However, because  
361 long-term effectiveness is not easily measurable, such modelling studies often have to  
362 assume a range of plausible efficacies with variable theoretical support. Modelling studies  
363 have suggested larval control (\$615-1,267 / DALY) [32] and more generic packages of vector  
364 control (\$679-1907 / DALY) [20] can also be cost effective depending on true effectiveness.  
365 Finally, several models have predicted the cost-effectiveness of dengue vaccines [22, 35].  
366 The cost-effectiveness of WHO's recommended test-and-vaccinate strategy in Indonesia in  
367 2015 was 0.8 to 0.6 times the per capita GDP (i.e., \$2,700 and \$2,000) if dengue  
368 seroprevalence rates at age 9 were 50% and 70%, respectively [22]. Despite vaccination  
369 having a less favourable predicted cost-effectiveness than *Wolbachia*, it is likely both  
370 vaccine and vector control will be necessary to achieve control in the highest transmission  
371 areas. Further work is needed to understand how the economics of combinations of  
372 interventions vary across transmission strata.

373 Given that *Wolbachia* is also not predicted to fully eliminate dengue virus transmission in  
374 highly endemic settings [16, 17] and given that many countries already have established  
375 dengue control programmes, there is a pressing need to understand how *Wolbachia*  
376 interacts with other types of vector control and how the optimal package of interventions  
377 may change in different environments. Modelling and mapping techniques are critical for  
378 such investigations due to the impracticality of conducting field trials among the many  
379 combinations of different interventions [36, 37].

380 Our approach to assessing the cost-effectiveness of *Wolbachia* combines the best currently  
381 available evidence for the effect of *Wolbachia* on transmission [38] with a long-term  
382 mathematical model [16] to overcome limitations of both of these approaches. This work  
383 aims to provide an evidence-based first estimate that gives quantitative support behind the  
384 decision to invest large sums of money in an intervention that is likely to have deferred but  
385 substantial benefits. Using model-based estimates of the true case and economic burden of  
386 dengue [16, 25] in Indonesia was a critical step in our approach. Using reported case data  
387 would have significantly underestimated the cost-effectiveness of *Wolbachia* and more  
388 research is needed to understand, adjust for and ultimately fill gaps in disease surveillance  
389 [39].

390 This analysis was subject to a number of limitations. First, our model did not consider  
391 logistical constraints that may exist in releasing *Wolbachia* infected mosquitoes at this scale.  
392 The largest current planned releases of *Wolbachia* mosquitoes is in Medellin Colombia  
393 where a sequenced programme will cover a combined 1.7 million people over 151km<sup>2</sup>.  
394 Reaching high coverage of *Wolbachia* for Jakarta's 11 million residents and 764 km<sup>2</sup> land  
395 area, particularly over a three-year accelerated campaign, may not be logistically feasible.  
396 New approaches to large scale community engagement and recruitment of release teams  
397 need to be developed. There may also be constraints on the portability of assets, such as  
398 centralised distribution of mosquitoes or laboratory testing, across areas as wide as Bali that  
399 we did not consider. Second, cost data for existing *Wolbachia* releases were based on  
400 budgeted costs; actual costs may differ by the end of the programme. Third, our analysis  
401 only included the effects of *Wolbachia* on dengue, despite showing strong protective effects  
402 against a range of other arboviral diseases [3–5]. Given chikungunya is also ubiquitous in  
403 Indonesia [40] our predictions may underestimate the cost-effectiveness of *Wolbachia*.  
404 Finally, it should be mentioned that the cost-effectiveness analysis presented here is  
405 intended to form one part of the wider evidence base on whether or where *Wolbachia*  
406 should be scaled up. To date, successful *Wolbachia* programmes have been underpinned by  
407 sustained and robust engagement with both the community and local stakeholders [13, 41].  
408 In this analysis we make clear assumptions about the success of establishing *Wolbachia* in a  
409 target area, but clearly an assessment of feasibility of this aim is a necessary precursor to  
410 assessments of cost-effectiveness.

411 The biggest strength of our analysis is the use of comprehensive, detailed spatiotemporal  
412 models that incorporate the latest projections of dengue case and economic burden and the  
413 likely impact *Wolbachia* could have on when deployed at scale. Given *Wolbachia* is an early  
414 stage novel intervention, we have also endeavoured to include the broad range of  
415 uncertainty that exists in each of these inputs and assess their impact overall cost-  
416 effectiveness. Such comparisons are important if the high upfront investment costs of  
417 *Wolbachia* are to be justified and these results can be used as part of the evidence base in  
418 the decision to accelerate scale up of *Wolbachia* to address the growing needs of arboviral  
419 control.



## 420 Conclusions

421 In conclusion, in this study we show that *Wolbachia* has the potential to be a highly cost  
422 effective and even cost saving intervention, especially if targeted to high density cities  
423 where the burden of dengue is concentrated. These findings are largely robust to  
424 uncertainties in the long-term performance of *Wolbachia*, but further longitudinal field data  
425 with epidemiological outcome measures are required to validate these predictions and  
426 assess how cost-effectiveness changes when combined with other vector control  
427 interventions and vaccines.

## 428 References

- 429 1. Bowman LR, Donegan S, McCall PJ. Is dengue vector control deficient in effectiveness or  
430 evidence?: systematic review and meta-analysis. *PLoS Negl Trop Dis*. 2016;10:e0004551.  
431 doi:10.1371/journal.pntd.0004551.
- 432 2. Ritchie SA, Staunton KM. Reflections from an old Queenslander: Can rear and release  
433 strategies be the next great era of vector control? *Proceedings of the Royal Society B:*  
434 *Biological Sciences*. 2019;286:20190973.
- 435 3. Walker T, Johnson PH, Moreira LA, Iturbe-Ormaetxe I, Frentiu FD, McMeniman CJ, et al.  
436 The *wMel Wolbachia* strain blocks dengue and invades caged *Aedes aegypti* populations.  
437 *Nature*. 2011;476:450–3. doi:10.1038/nature10355.
- 438 4. Aliota MT, Peinado SA, Velez ID, Osorio JE. The *wMel* strain of *Wolbachia* Reduces  
439 Transmission of Zika virus by *Aedes aegypti*. *Sci Rep*. 2016;6:28792.
- 440 5. van den Hurk AF, Hall-Mendelin S, Pyke AT, Frentiu FD, McElroy K, Day A, et al. Impact of  
441 *Wolbachia* on Infection with Chikungunya and Yellow Fever Viruses in the Mosquito Vector  
442 *Aedes aegypti*. *PLoS Negl Trop Dis*. 2012;6:e1892. doi:10.1371/journal.pntd.0001892.
- 443 6. Nazni WA, Hoffmann AA, Afizah AN, Cheong YL, Mancini M V., Golding N, et al.  
444 Establishment of *Wolbachia* strain *wAlbB* in Malaysian populations of *Aedes aegypti* for  
445 dengue control. *Curr Biol*. 2019;29:1–8.
- 446 7. Zheng X, Zhang D, Li Y, Yang C, Wu Y, Liang X, et al. Incompatible and sterile insect  
447 techniques combined eliminate mosquitoes. *Nature*. 2019;572:56–61.
- 448 8. Singapore National Environment Agency. Project *Wolbachia* Singapore. 2019.  
449 [https://www.nea.gov.sg/corporate-functions/resources/research/wolbachia-aedes-](https://www.nea.gov.sg/corporate-functions/resources/research/wolbachia-aedes-mosquito-suppression-strategy/project-wolbachia-singapore)  
450 [mosquito-suppression-strategy/project-wolbachia-singapore](https://www.nea.gov.sg/corporate-functions/resources/research/wolbachia-aedes-mosquito-suppression-strategy/project-wolbachia-singapore). Accessed 30 Sep 2019.

- 451 9. Mains JW, Kelly PH, Dobson KL, Petrie WD, Dobson SL. Localized Control of *Aedes aegypti*  
452 (Diptera: *Culicidae*) in Miami, FL, via Inundative Releases of *Wolbachia*-Infected Male  
453 Mosquitoes. *J Med Entomol*. 2019;56:1296–303. doi:10.1093/jme/tjz051.
- 454 10. Flores HA, O’Neill SL. Controlling vector-borne diseases by releasing modified  
455 mosquitoes. *Nat Rev Microbiol*. 2018;16:508–18. doi:10.1038/s41579-018-0025-0.
- 456 11. Schmidt TL, Barton NH, Rašić G, Turley AP, Montgomery BL, Iturbe-Ormaetxe I, et al.  
457 Local introduction and heterogeneous spatial spread of dengue-suppressing *Wolbachia*  
458 through an urban population of *Aedes aegypti*. *PLOS Biol*. 2017;15:e2001894.  
459 doi:10.1371/journal.pbio.2001894.
- 460 12. Garcia G de A, Sylvestre G, Aguiar R, da Costa GB, Martins AJ, Lima JBP, et al. Matching  
461 the genetics of released and local *Aedes aegypti* populations is critical to assure *Wolbachia*  
462 invasion. *PLoS Negl Trop Dis*. 2019;13:e0007023. doi:10.1371/journal.pntd.0007023.
- 463 13. O’Neill SL, Ryan PA, Turley AP, Wilson G, Retzki K, Iturbe-Ormaetxe I, et al. Scaled  
464 deployment of *Wolbachia* to protect the community from dengue and other *Aedes*  
465 transmitted arboviruses. *Gates Open Res*. 2018;2:36. doi:10.12688/gatesopenres.12844.2.
- 466 14. Anders KL. Growing evidence that the World Mosquito Program’s *Wolbachia* method  
467 reduces dengue transmission. In: 68th Annual Meeting of the American Society of Tropical  
468 Medicine and Hygiene. National Harbour, MD; 2019.  
469 <https://www.abstractsonline.com/pp8/#!/7935/presentation/466>.
- 470 15. Anders KL, Indriani C, Ahmad RA, Tantowijoyo W, Arguni E, Andari B, et al. The AWED  
471 trial (Applying *Wolbachia* to Eliminate Dengue) to assess the efficacy of *Wolbachia*-infected  
472 mosquito deployments to reduce dengue incidence in Yogyakarta, Indonesia: study protocol  
473 for a cluster randomised controlled trial. *Trials*. 2018;19:302. doi:10.1186/s13063-018-2670-  
474 z.
- 475 16. O’Reilly KM, Hendrickx E, Kharisma DD, Wilastonegoro NN, Carrington LB, Elyazar IRF, et  
476 al. Estimating the burden of dengue and the impact of release of *wMel Wolbachia*-infected  
477 mosquitoes in Indonesia: a modelling study. *BMC Med*. 2019;17:172.
- 478 17. Ferguson NM, Kien DTH, Clapham H, Aguas R, Trung VT, Chau TNB, et al. Modeling the  
479 impact on virus transmission of *Wolbachia*-mediated blocking of dengue virus infection of  
480 *Aedes aegypti*. *Sci Transl Med*. 2015;7:279ra37. doi:10.1126/scitranslmed.3010370.
- 481 18. General Secretary of the Ministry of Health of Indonesia. Guidelines for Indonesian  
482 health program with family approach (Pedoman umum program Indonesia sehat dengan

- 483 pendekatan keluarga). Jakarta: Kementerian Kesehatan Republik Indonesia; 2016.
- 484 [http://www.depkes.go.id/resources/download/lain/Buku Program Indonesia Sehat dengan](http://www.depkes.go.id/resources/download/lain/Buku%20Program%20Indonesia%20Sehat%20dengan%20Pendekatan%20Keluarga.pdf)
- 485 [Pendekatan Keluarga.pdf](http://www.depkes.go.id/resources/download/lain/Buku%20Program%20Indonesia%20Sehat%20dengan%20Pendekatan%20Keluarga.pdf).
- 486 19. World Mosquito Program Indonesia. Research as the evidence of deployment impact of
- 487 *Aedes aegypti* with *Wolbachia* to reduce the dengue transmission in Yogyakarta City (Riset
- 488 untuk membuktikan dampak Pelepasan *Aedes aegypti* ber-*Wolbachia* berskala luas pada
- 489 penurun. Yogyakarta, Indonesia; 2016.
- 490 20. Fitzpatrick C, Haines A, Bangert M, Farlow A, Hemingway J, Velayudhan R. An economic
- 491 evaluation of vector control in the age of a dengue vaccine. *PLoS Negl Trop Dis*.
- 492 2017;11:e0005785. doi:10.1371/journal.pntd.0005785.
- 493 21. Flasche S, Jit M, Rodríguez-Barraquer I, Coudeville L, Recker M, Koelle K, et al. The long-
- 494 term safety, public health impact, and cost-effectiveness of routine vaccination with a
- 495 recombinant, live-attenuated dengue vaccine (Dengvaxia): A model comparison study. *PLOS*
- 496 *Med*. 2016;13:e1002181. doi:10.1371/journal.pmed.1002181.
- 497 22. Coudeville L, Baurin N, Shepard DS. The potential impact of dengue vaccination with,
- 498 and without, pre-vaccination screening. *Vaccine*. :in press.
- 499 23. International Monetary Fund. World Economic Outlook Database, April 2017, section 5:
- 500 Report for Selected Countries and Subjects.
- 501 [https://www.imf.org/external/pubs/ft/weo/2018/01/weodata/weorept.aspx?pr.x=43&pr.y](https://www.imf.org/external/pubs/ft/weo/2018/01/weodata/weorept.aspx?pr.x=43&pr.y=19&sy=2017&ey=2017&scsm=1&ssd=1&sort=country&ds=.&br=1&c=512%2C672%2C914%2C946%2C612%2C137%2C614%2C546%2C311%2C962%2C213%2C674%2C911%2C676%2C193%2C548%2C122%2C556%2C912%2C6)
- 502 [=19&sy=2017&ey=2017&scsm=1&ssd=1&sort=country&ds=.&br=1&c=512%2C672%2C914](https://www.imf.org/external/pubs/ft/weo/2018/01/weodata/weorept.aspx?pr.x=43&pr.y=19&sy=2017&ey=2017&scsm=1&ssd=1&sort=country&ds=.&br=1&c=512%2C672%2C914%2C946%2C612%2C137%2C614%2C546%2C311%2C962%2C213%2C674%2C911%2C676%2C193%2C548%2C122%2C556%2C912%2C6)
- 503 [%2C946%2C612%2C137%2C614%2C546%2C311%2C962%2C213%2C674%2C911%2C676%2](https://www.imf.org/external/pubs/ft/weo/2018/01/weodata/weorept.aspx?pr.x=43&pr.y=19&sy=2017&ey=2017&scsm=1&ssd=1&sort=country&ds=.&br=1&c=512%2C672%2C914%2C946%2C612%2C137%2C614%2C546%2C311%2C962%2C213%2C674%2C911%2C676%2C193%2C548%2C122%2C556%2C912%2C6)
- 504 [C193%2C548%2C122%2C556%2C912%2C6](https://www.imf.org/external/pubs/ft/weo/2018/01/weodata/weorept.aspx?pr.x=43&pr.y=19&sy=2017&ey=2017&scsm=1&ssd=1&sort=country&ds=.&br=1&c=512%2C672%2C914%2C946%2C612%2C137%2C614%2C546%2C311%2C962%2C213%2C674%2C911%2C676%2C193%2C548%2C122%2C556%2C912%2C6). Accessed 23 Jun 2018.
- 505 24. O'Neill SL, Ryan PA, Turley AP, Wilson G, Retzki K, Iturbe-Ormaetxe I, et al. Scaled
- 506 deployment of *Wolbachia* to protect the community from *Aedes* transmitted arboviruses.
- 507 *Gates Open Res*. 2018;2:36. doi:10.12688/gatesopenres.12844.1.
- 508 25. Wilastonegoro N, Kharisma D, Laksanawati I, Halasa-Rappel Y, Brady O, Shepard D. Cost
- 509 of dengue illness in Indonesia: from hospital to non-medical settings. *Am J Trop Med Hyg*.
- 510 2019;:submitted.
- 511 26. Hoffmann AA, Montgomery BL, Popovici J, Iturbe-Ormaetxe I, Johnson PH, Muzzi F, et al.
- 512 Successful establishment of *Wolbachia* in *Aedes* populations to suppress dengue
- 513 transmission. *Nature*. 2011;476:454–7. doi:10.1038/nature10356.
- 514 27. Neumann PJ, Russell LB, Siegel JE, Prosser LA, Krahn M, Gold MR. Using Cost-

- 515 Effectiveness Analysis in Health and Medicine: Experiences since the Original Panel. In:  
516 Neumann PJ, Sanders GD, Russell LB, Siegel JE, Ganiats TG, editors. Cost-Effectiveness in  
517 Health and Medicine. 2nd editio. Oxford University Press; 2017. p. 1–37.  
518 28. WorldPop. Indonesia 100m populaiton. 2018.  
519 <http://www.worldpop.org.uk/data/summary/?doi=10.5258/SOTON/WP00114>. Accessed 21  
520 Dec 2018.
- 521 29. Hoffmann AA, Ross PA, Rašić G. *Wolbachia* strains for disease control: ecological and  
522 evolutionary considerations. *Evol Appl*. 2015;8:751–68. doi:10.1111/eva.12286.
- 523 30. Huber K, Le Loan L, Hoang TH, Ravel S, Rodhain F, Failloux AB. Genetic differentiation of  
524 the dengue vector, *Aedes aegypti* (Ho Chi Minh City, Vietnam) using microsatellite markers.  
525 *Mol Ecol*. 2002;11:1629–35.
- 526 31. Suaya JA, Shepard DS, Chang M-S, Caram M, Hoyer S, Socheat D, et al. Cost-effectiveness  
527 of annual targeted larviciding campaigns in Cambodia against the dengue vector *Aedes*  
528 *aegypti*. *Trop Med Int Health*. 2007;12:1026–36. doi:10.1111/j.1365-3156.2007.01889.x.
- 529 32. Luz PM, Vanni T, Medlock J, Paltiel AD, Galvani AP. Dengue vector control strategies in  
530 an urban setting: an economic modelling assessment. *Lancet*. 2011;377:1673–80.  
531 doi:10.1016/S0140-6736(11)60246-8.
- 532 33. Mendoza-Cano O, Hernandez-Suarez CM, Trujillo X, Ochoa Diaz-Lopez H, Lugo-Radillo A,  
533 Espinoza-Gomez F, et al. Cost-effectiveness of the strategies to reduce the incidence of  
534 dengue in Colima, México. *Int J Environ Res Public Health*. 2017;14:890.  
535 doi:10.3390/ijerph14080890.
- 536 34. Liyanage P, Rocklöv J, Tissera H, Palihawadana P, Wilder-Smith A, Tozan Y. Evaluation of  
537 intensified dengue control measures with interrupted time series analysis in the Panadura  
538 Medical Officer of Health division in Sri Lanka: a case study and cost-effectiveness analysis.  
539 *Lancet Planet Heal*. 2019;3:e211–8.
- 540 35. de Soárez PC, Silva AB, Randi BA, Azevedo LM, Novaes HMD, Sartori AMC. Systematic  
541 review of health economic evaluation studies of dengue vaccines. *Vaccine*. 2019;37:2298–  
542 310.
- 543 36. Brady OJ, Slater HC, Pemberton-Ross P, Wenger E, Maude RJ, Ghani AC, et al. Role of  
544 mass drug administration in elimination of *Plasmodium falciparum* malaria: a consensus  
545 modelling study. *Lancet Glob Heal*. 2017;5:e680-687.
- 546 37. Yakob L, Funk S, Camacho A, Brady O, Edmunds WJ. *Aedes aegypti* control through

547 modernized, integrated vector management. PLoS Curr.  
548 2017;;10.1371/currents.outbreaks.45deb8e03a438c4d088afb4.  
549 doi:10.1371/currents.outbreaks.45deb8e03a438c4d088afb4fafae8747.  
550 38. Carrington LB, Tran BCN, Le NTH, Luong TTH, Nguyen TT, Nguyen PT, et al. Field- and  
551 clinically derived estimates of *Wolbachia*-mediated blocking of dengue virus transmission  
552 potential in *Aedes aegypti* mosquitoes. Proc Natl Acad Sci U S A. 2018;115:361–6.  
553 doi:10.1073/pnas.1715788115.  
554 39. WHO. A Toolkit for national dengue burden estimation. Geneva; 2018.  
555 <https://www.who.int/denguecontrol/resources/WHO-CDS-NTD-VEM-2018.05/en/>.  
556 40. Harapan H, Michie A, Mudatsir M, Nusa R, Yohan B, Wagner AL, et al. Chikungunya virus  
557 infection in Indonesia: A systematic review and evolutionary analysis. BMC Infectious  
558 Diseases. 2019;19:243.  
559 41. Kolopack PA, Parsons JA, Lavery J V. What makes community engagement effective?:  
560 Lessons from the Eliminate Dengue Program in Queensland Australia. PLoS Negl Trop Dis.  
561 2015;9:e0003713.  
562  
563

## 564 List of abbreviations

565

|     |      |                               |
|-----|------|-------------------------------|
| 566 | CEA  | Cost Effectiveness Analysis   |
| 567 | DALY | Disability Adjusted Life Year |
| 568 | GDP  | Gross Domestic Product        |
| 569 | PPP  | Purchasing Power Parity       |
| 570 | SAR  | Special Autonomous Region     |
| 571 | USD  | United States Dollar          |
| 572 | WHO  | World Health Organization     |
| 573 | WMP  | World Mosquito Programme      |
| 574 |      |                               |

## 575 Declarations

576

### 577 Ethics approval and consent to participate

578 Not applicable

579

### 580 Consent for publication

581 Not applicable

582

### 583 Availability of data and materials

584 All data used in this analysis is publicly available and can be accessed in the related paper  
585 O'Reilly et al. [16] or in the Appendix of this paper. All code to reproduce our analysis is  
586 publicly available in the following GitHub repository:  
587 ([https://github.com/obrady/Wolbachia\\_CE/tree/V1](https://github.com/obrady/Wolbachia_CE/tree/V1)).

588

### 589 Competing interests

590 The authors declare that they have no competing interests

591

### 592 Funding

593 OJB was funded by a Sir Henry Wellcome Fellowship funded by the Wellcome Trust  
594 (206471/Z/17/Z) and a grant from the Bill and Melinda Gates Foundation (OP1183567)  
595 which also supports KMO. NNW, DDK and DSS are funded by a grant from the Bill & Melinda  
596 Gates Foundation (OPP1187889). The funders had no role in the study design, data  
597 collection and analysis, decision to publish or preparation of the manuscript.

598

### 599 Authors' contributions

600 OJB, DSS conceived and designed the study. KMO, OJB, EH, DDK, NNW and LSB analysed the  
601 data. OJB, DDK, NNW, KMO, EH, LSB, LY and DSS drafted and revised the manuscript. All  
602 authors read and approved the final manuscript.

603

### 604 Acknowledgements

605 The design of the study was developed independently, but benefitted from a series of in-  
606 depth discussions with representatives from WMP global headquarters in Melbourne  
607 Australia (including Cameron Simmons, Scott O'Neil and Reynold Dias) and field site  
608 coordinators from UGM, Yogyakarta city, Indonesia (including Adi Uterini). The investigators

609 had access to all the data and had final responsibility for the decision to submit for  
610 publication.

611

## 612 Tables

613

614 Table 1

|                                                         | Existing area         |                          | Candidate sites          |                          |                             |                          |                          |
|---------------------------------------------------------|-----------------------|--------------------------|--------------------------|--------------------------|-----------------------------|--------------------------|--------------------------|
|                                                         | Yogyakarta City       | Yogyakarta SAR           | Jakarta                  |                          | Bali                        |                          |                          |
| <b>Residents (millions)</b>                             | 0.46                  | 3.24                     | 11.19                    |                          | 4.08                        |                          |                          |
| <b>% of people covered by <i>Wolbachia</i></b>          | 100                   | 65.9                     | 100                      |                          | 59.7                        |                          |                          |
| <b>Area (km<sup>2</sup>)</b>                            | 37.24                 | 3,666.21                 | 764.48                   |                          | 6,476.03                    |                          |                          |
| <b>% of area eligible for <i>Wolbachia</i></b>          | 100                   | 24.8                     | 99.9                     |                          | 14.9                        |                          |                          |
| <b>Density in covered area (persons/km<sup>2</sup>)</b> | 12,351                | 2,352                    | 14,647                   |                          | 2,532                       |                          |                          |
| <b>Total cost (US\$ millions)</b>                       | <i>Accel.</i>         | <i>Seq.</i>              | <i>Accel.</i>            | <i>Seq.</i>              | <i>Accel.</i>               | <i>Seq.</i>              | <i>Accel.</i>            |
|                                                         | 5.84<br>(5.81 - 5.87) | 27.41<br>(27.37 - 27.45) | 30.68<br>(30.65 - 30.73) | 83.33<br>(83.22 - 83.49) | 133.30<br>(133.14 - 133.49) | 34.88<br>(34.81 - 34.93) | 51.66<br>(51.57 - 51.72) |
| <b>Cost per person covered</b>                          | 12.70<br>(12.63 -     | 12.83<br>(12.81 - 12.85) | 14.36<br>(14.35 - 14.38) | 7.45<br>(7.44 - 7.46)    | 11.92<br>(11.90 - 11.93)    | 14.32<br>(14.29 - 14.34) | 21.21<br>(21.17 - 21.23) |

|  |        |  |  |  |  |  |  |
|--|--------|--|--|--|--|--|--|
|  | 12.77) |  |  |  |  |  |  |
|--|--------|--|--|--|--|--|--|

615

616 Table 2

|                                                         | Committed area             | Scale up scenario            |                                 |                               |
|---------------------------------------------------------|----------------------------|------------------------------|---------------------------------|-------------------------------|
|                                                         | Yogyakarta City            | Remaining Yogyakarta SAR     | Jakarta                         | Bali                          |
| <b>Baseline cases per year (area wide)</b>              | 14,488<br>(2,955 – 47,858) | 93,604<br>(21,527 – 249,843) | 444,528<br>(97,542 – 1,189,217) | 117,840<br>(27,862 – 324,114) |
| <b>Post <i>Wolbachia</i> cases per year (area wide)</b> | 722<br>(0 – 30,140)        | 36,674<br>(6,805 – 180,567)  | 127,712<br>(0 – 749,850)        | 62,033<br>(9,810 – 237,984)   |
| <b>Area-wide percent reduction (%)</b>                  | 94.4<br>(36.5 – 100)       | 59.1<br>(25.6 – 69.6)        | 65.7<br>(36.7 – 100)            | 52.4<br>(24.2 – 66.9)         |
| <b>Percent reduction within treated areas</b>           | 94.4<br>(36.5 – 100)       | 87.2<br>(37.2 – 100)         | 65.7<br>(36.7 – 100)            | 82.8<br>(37.3 – 100)          |
| <b>Averted medical costs per year (millions USD)*</b>   | 0.46<br>(0.14 – 1.19)      | 2.16<br>(0.67 – 4.70)        | 12.91<br>(4.49 – 25.08)         | 2.58<br>(0.82 – 5.11)         |
| <b>Averted societal costs per year (millions USD)*</b>  | 0.52<br>(0.21 – 0.98)      | 2.36<br>(1.05 – 4.28)        | 14.17<br>(6.09 – 24.27)         | 2.77<br>(1.23 – 4.74)         |

617

618 Table 3

|                                                                           | Committed area              | Scale up scenario               |                           |                             |
|---------------------------------------------------------------------------|-----------------------------|---------------------------------|---------------------------|-----------------------------|
|                                                                           | Yogyakarta City             | Remaining Yogyakarta SAR        | Jakarta                   | Bali                        |
|                                                                           |                             | <u>Accelerated introduction</u> |                           |                             |
| <b>Gross \$/DALY averted</b>                                              | \$ 1,831<br>(892 – 4,522)   | \$ 2,133<br>(1,048 – 4,953)     | \$ 1,566<br>(857 – 3,244) | \$ 2,996<br>(1,599 – 6,778) |
| <b>Net \$/DALY averted (including averted medical and societal costs)</b> | \$ -543<br>(-1,419 – 1,976) | \$ -242<br>(-1,275 – 2,438)     | \$ -839<br>(-1,500 – 731) | \$ 671<br>(-719 – 4,219)    |
|                                                                           |                             | <u>Sequenced introduction</u>   |                           |                             |
| <b>Gross \$/DALY averted</b>                                              | \$ 1,519<br>(737 – 3,732)   | \$ 2,168<br>(1,064 – 5,042)     | \$ 1,111<br>(611 – 2,307) | \$ 2,366<br>(1,264 – 5,379) |



|                                                                         |                             |                             |                              |                           |
|-------------------------------------------------------------------------|-----------------------------|-----------------------------|------------------------------|---------------------------|
| <b>Net \$/DALY averted (including health sector and societal costs)</b> | \$ -862<br>(-1,572 – 1,185) | \$ -210<br>(-1,258 – 2,528) | \$ -1,280<br>(-1,772 – -207) | \$ 64<br>(-1,050 – 2,834) |
|-------------------------------------------------------------------------|-----------------------------|-----------------------------|------------------------------|---------------------------|

## 619 Table legends

620 Table 1: Baseline characteristics and model-predicted release costs for current and future  
 621 release areas. Prices are in present value 2018 USD. Figures in brackets represent 95%  
 622 uncertainty intervals. All costs are discounted at 3% per annum. Accel. denotes accelerated;  
 623 Seq. denotes sequenced.

624  
 625 Table 2: Predicted per year benefits of Wolbachia programmes in four sites. Only eligible  
 626 areas (at least 1,000 people per km<sup>2</sup>) receive treatment. All costs are in 2018 US dollars and  
 627 are not discounted. Figures in brackets represent 95% uncertainty intervals.

628  
 629 Table 3: Predicted cost-effectiveness of Wolbachia at the end of the programme.  
 630 Accelerated and sequenced programmes correspond to completing roll out in 3 and 10  
 631 years, respectively. Only eligible areas (at least 1,000 people per km<sup>2</sup>) receive treatment. All  
 632 costs are in present value 2018 US dollars. All costs and benefits are discounted at a rate of  
 633 3% per annum. Net costs include cost offsets for medical and societal benefits from averted  
 634 cases. Figures in brackets represent 95% uncertainty intervals.

635  
 636

## 637 Figure legends

638  
 639 Figure 1: The fitted relationship between human population density and projected cost of  
 640 deployment of Wolbachia per km<sup>2</sup> (A) and cost per person (B). All axes are on log<sub>10</sub> scales.  
 641 The cost per km<sup>2</sup> model fit mean (solid lines) and standard error (dashed lines) for each  
 642 programme phase are shown. Circle area is proportional to size of release area in each site.

643  
 644 Figure 2: Distribution of cumulative costs and savings over time in an accelerated (3-year,  
 645 left panel) and sequenced (10-year, right panel) roll out in Yogyakarta City in 2018 USD.  
 646 Uncertainty represents uncertainty in programme cost and intervention effectiveness

647 beyond the 10-year post-release time horizon used in this analysis. All costs and benefits are  
648 in present-day value 2018 USD discounted at 3% per annum.

649  
650 Figure 3: Maps of the gross cost-effectiveness of accelerated Wolbachia releases in  
651 Yogyakarta City (A), Yogyakarta SAR (B), Jakarta (C) and Bali (D). Cost effectiveness is  
652 measured in present value 2018 USD per Disability Adjusted Life Year (DALY) averted with  
653 green areas being most favourable. Select areas of interest and the national orientation of  
654 these sites (E) are shown for reference, more detailed background maps are available in the  
655 Appendix pages 9-13. Site A falls within site B and is marked in a red outline.

656  
657 Figure 4: Benefit-cost ratios and their sensitivity. 4A) The predicted benefit-cost ratios of a  
658 sequenced release programme in each site disaggregated by type of benefit. A benefit-cost  
659 ratio of 1.0 indicates cost saving. 4B) Sensitivity of cost-effectiveness of a sequenced release  
660 in Yogyakarta City if the 2.5% value (orange) or 97.5% value (green) were used as opposed  
661 to the median value for selected parameters. Net cost-effectiveness is in 2018 present day  
662 value USD per Disability Adjusted Life Year averted and includes offsets from health sector  
663 and societal perspectives. 4C) Sensitivity of benefit-cost ratios (BCRs) to future challenges or  
664 changes to a sequenced release in Yogyakarta City. Green dots show potential cost-saving  
665 measures, red dots unaddressed challenges to the programme and yellow dots addressed  
666 challenges to the programme. Dots above the BCR = 1.0 line are cost saving from the  
667 societal perspective.

668

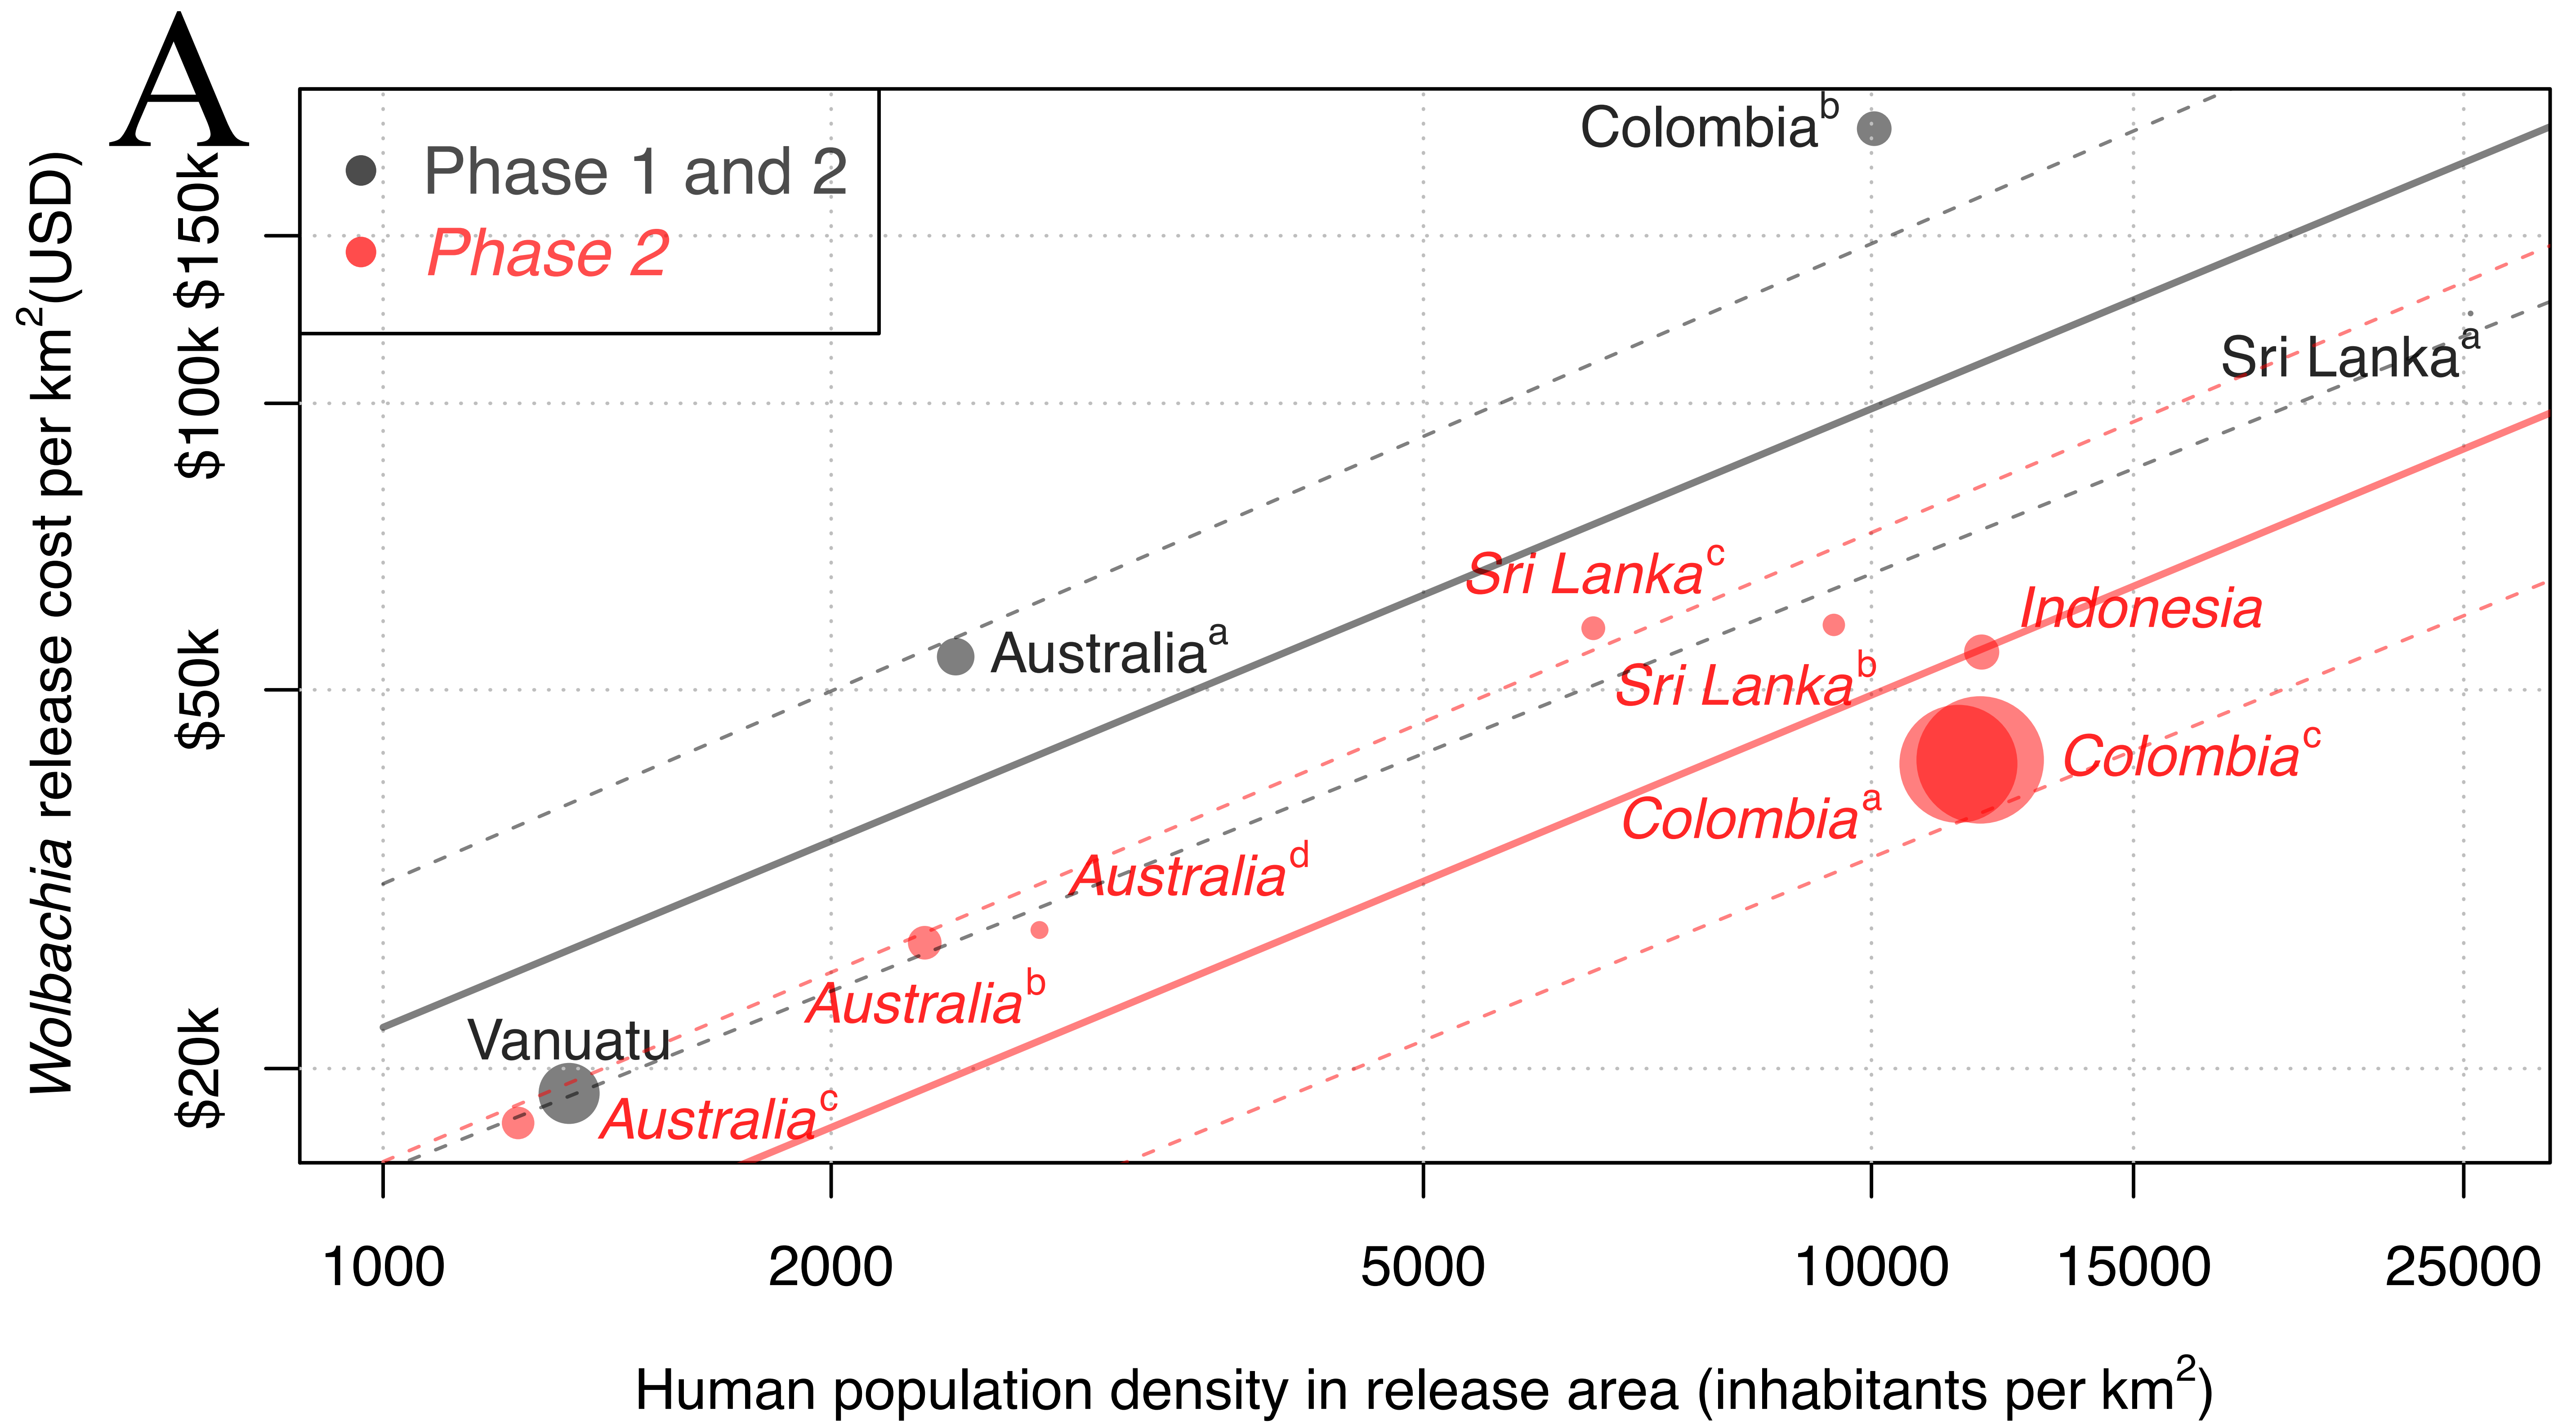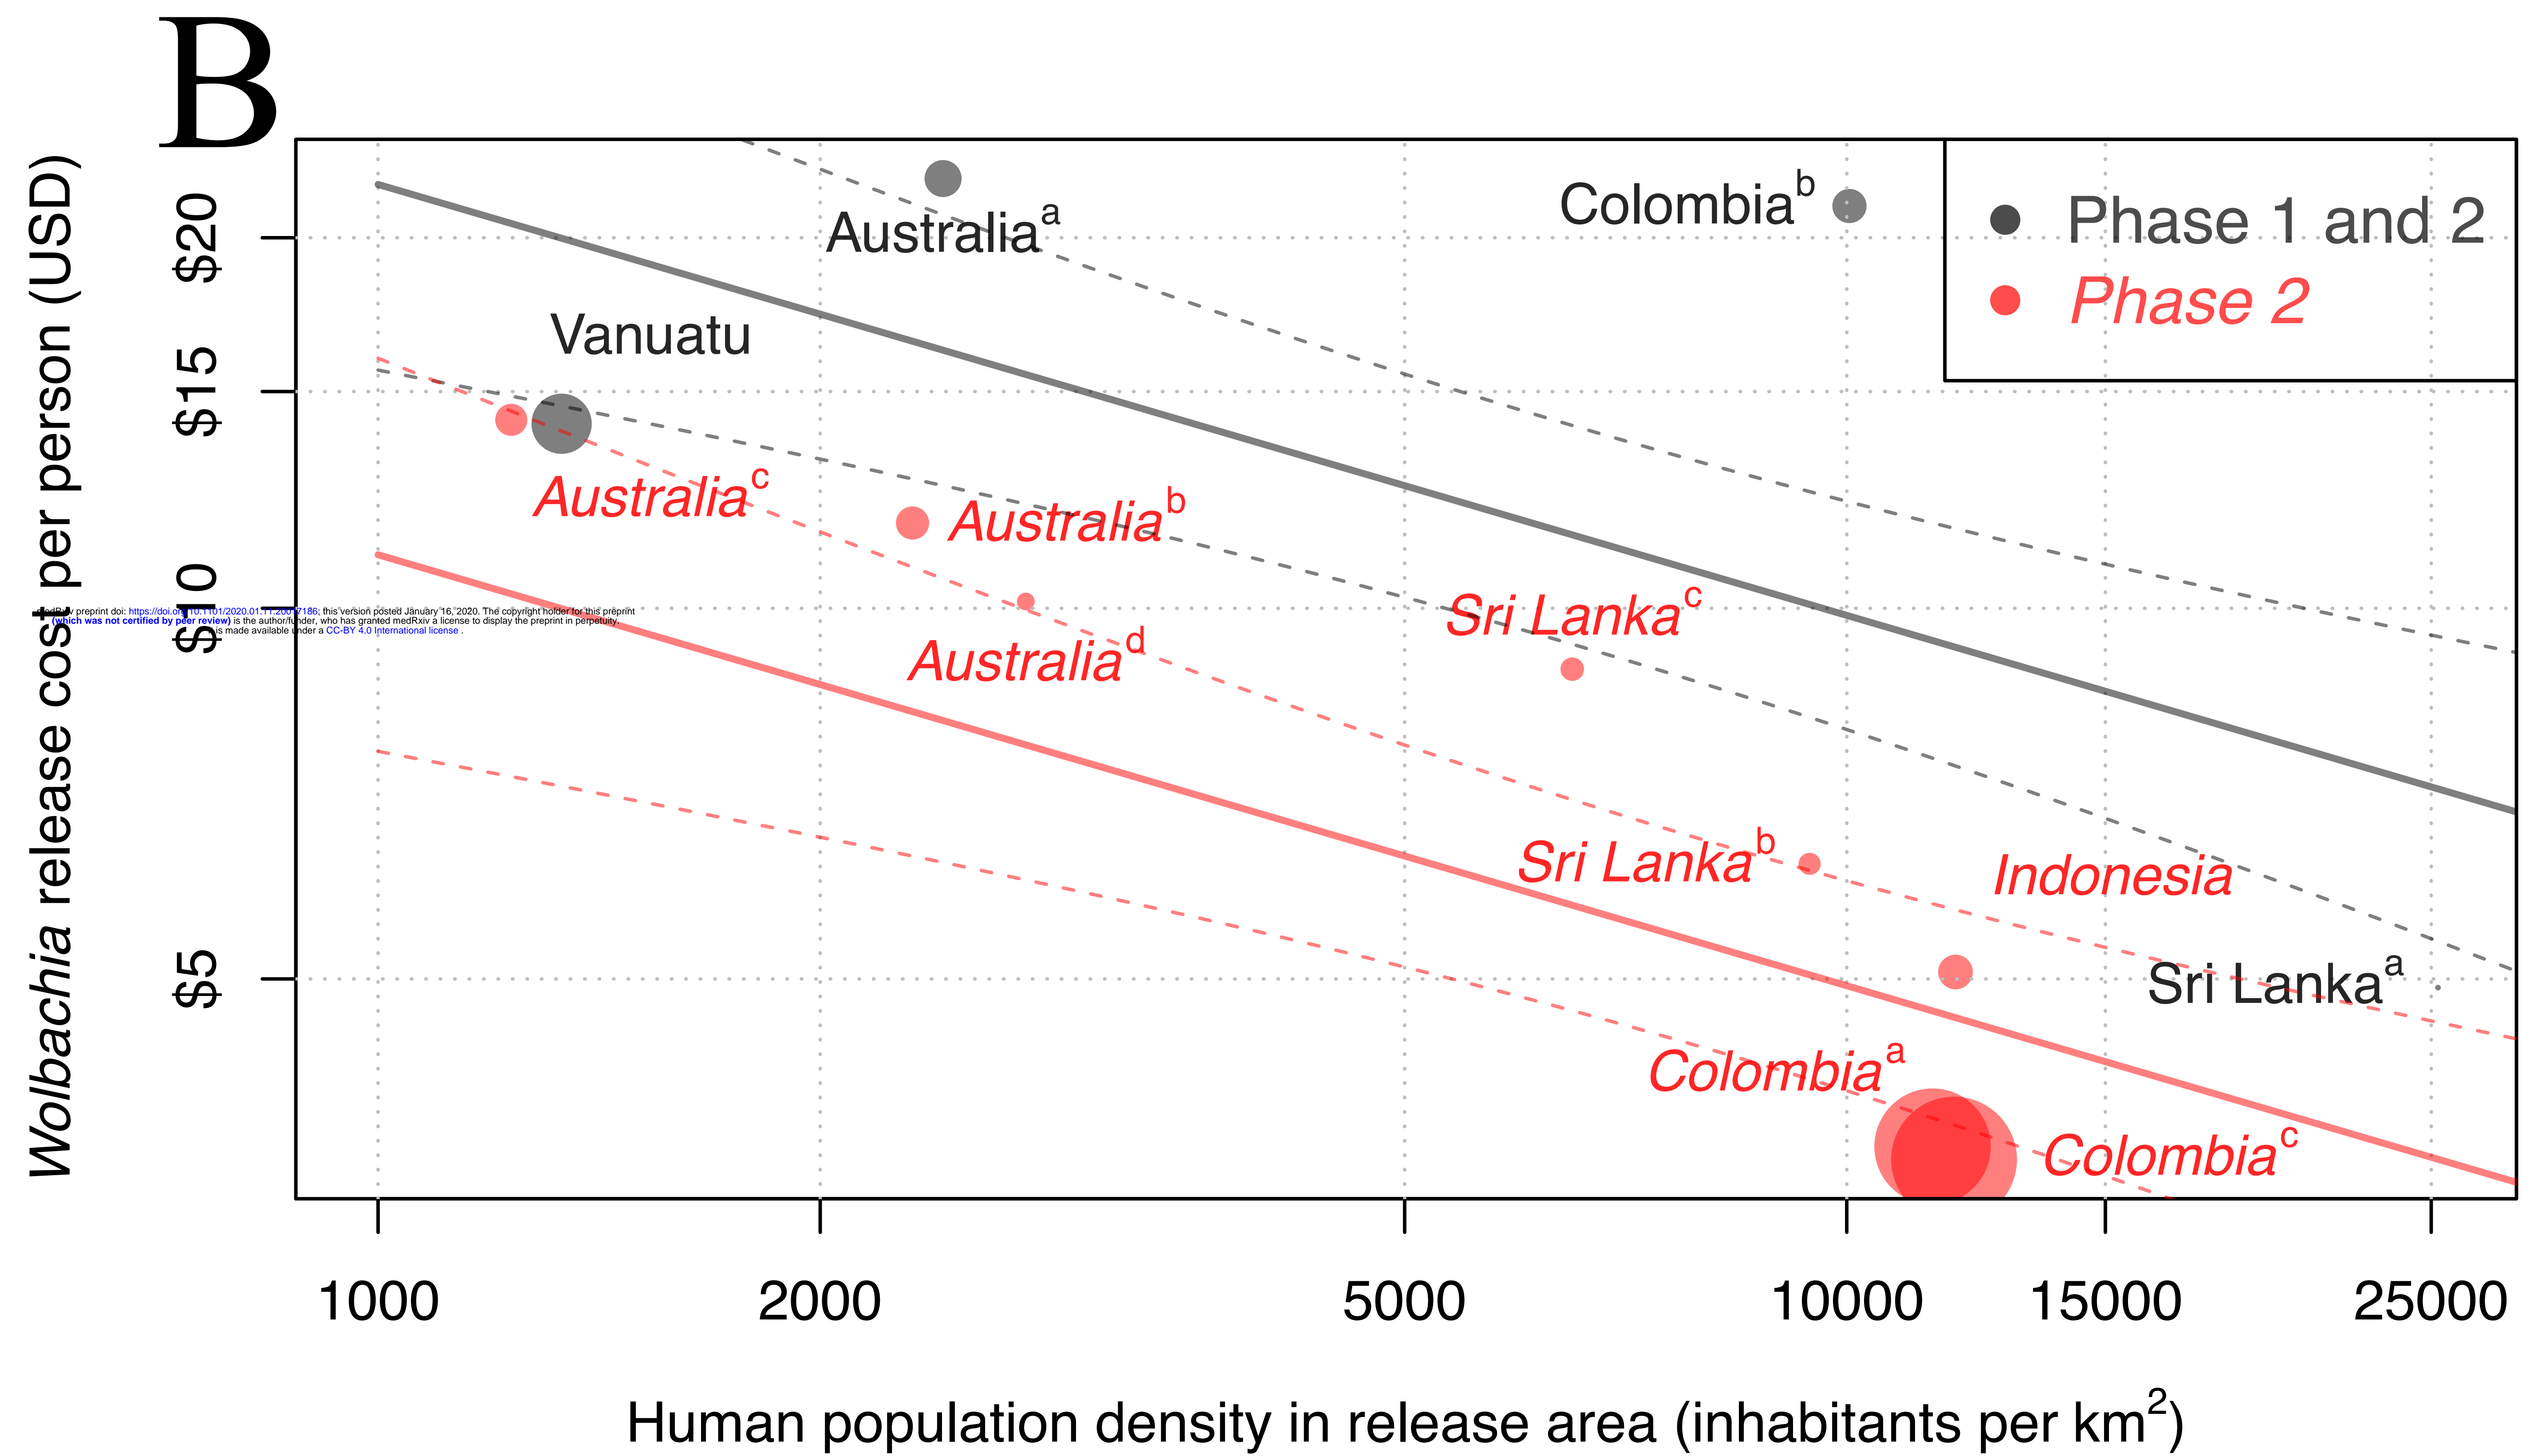

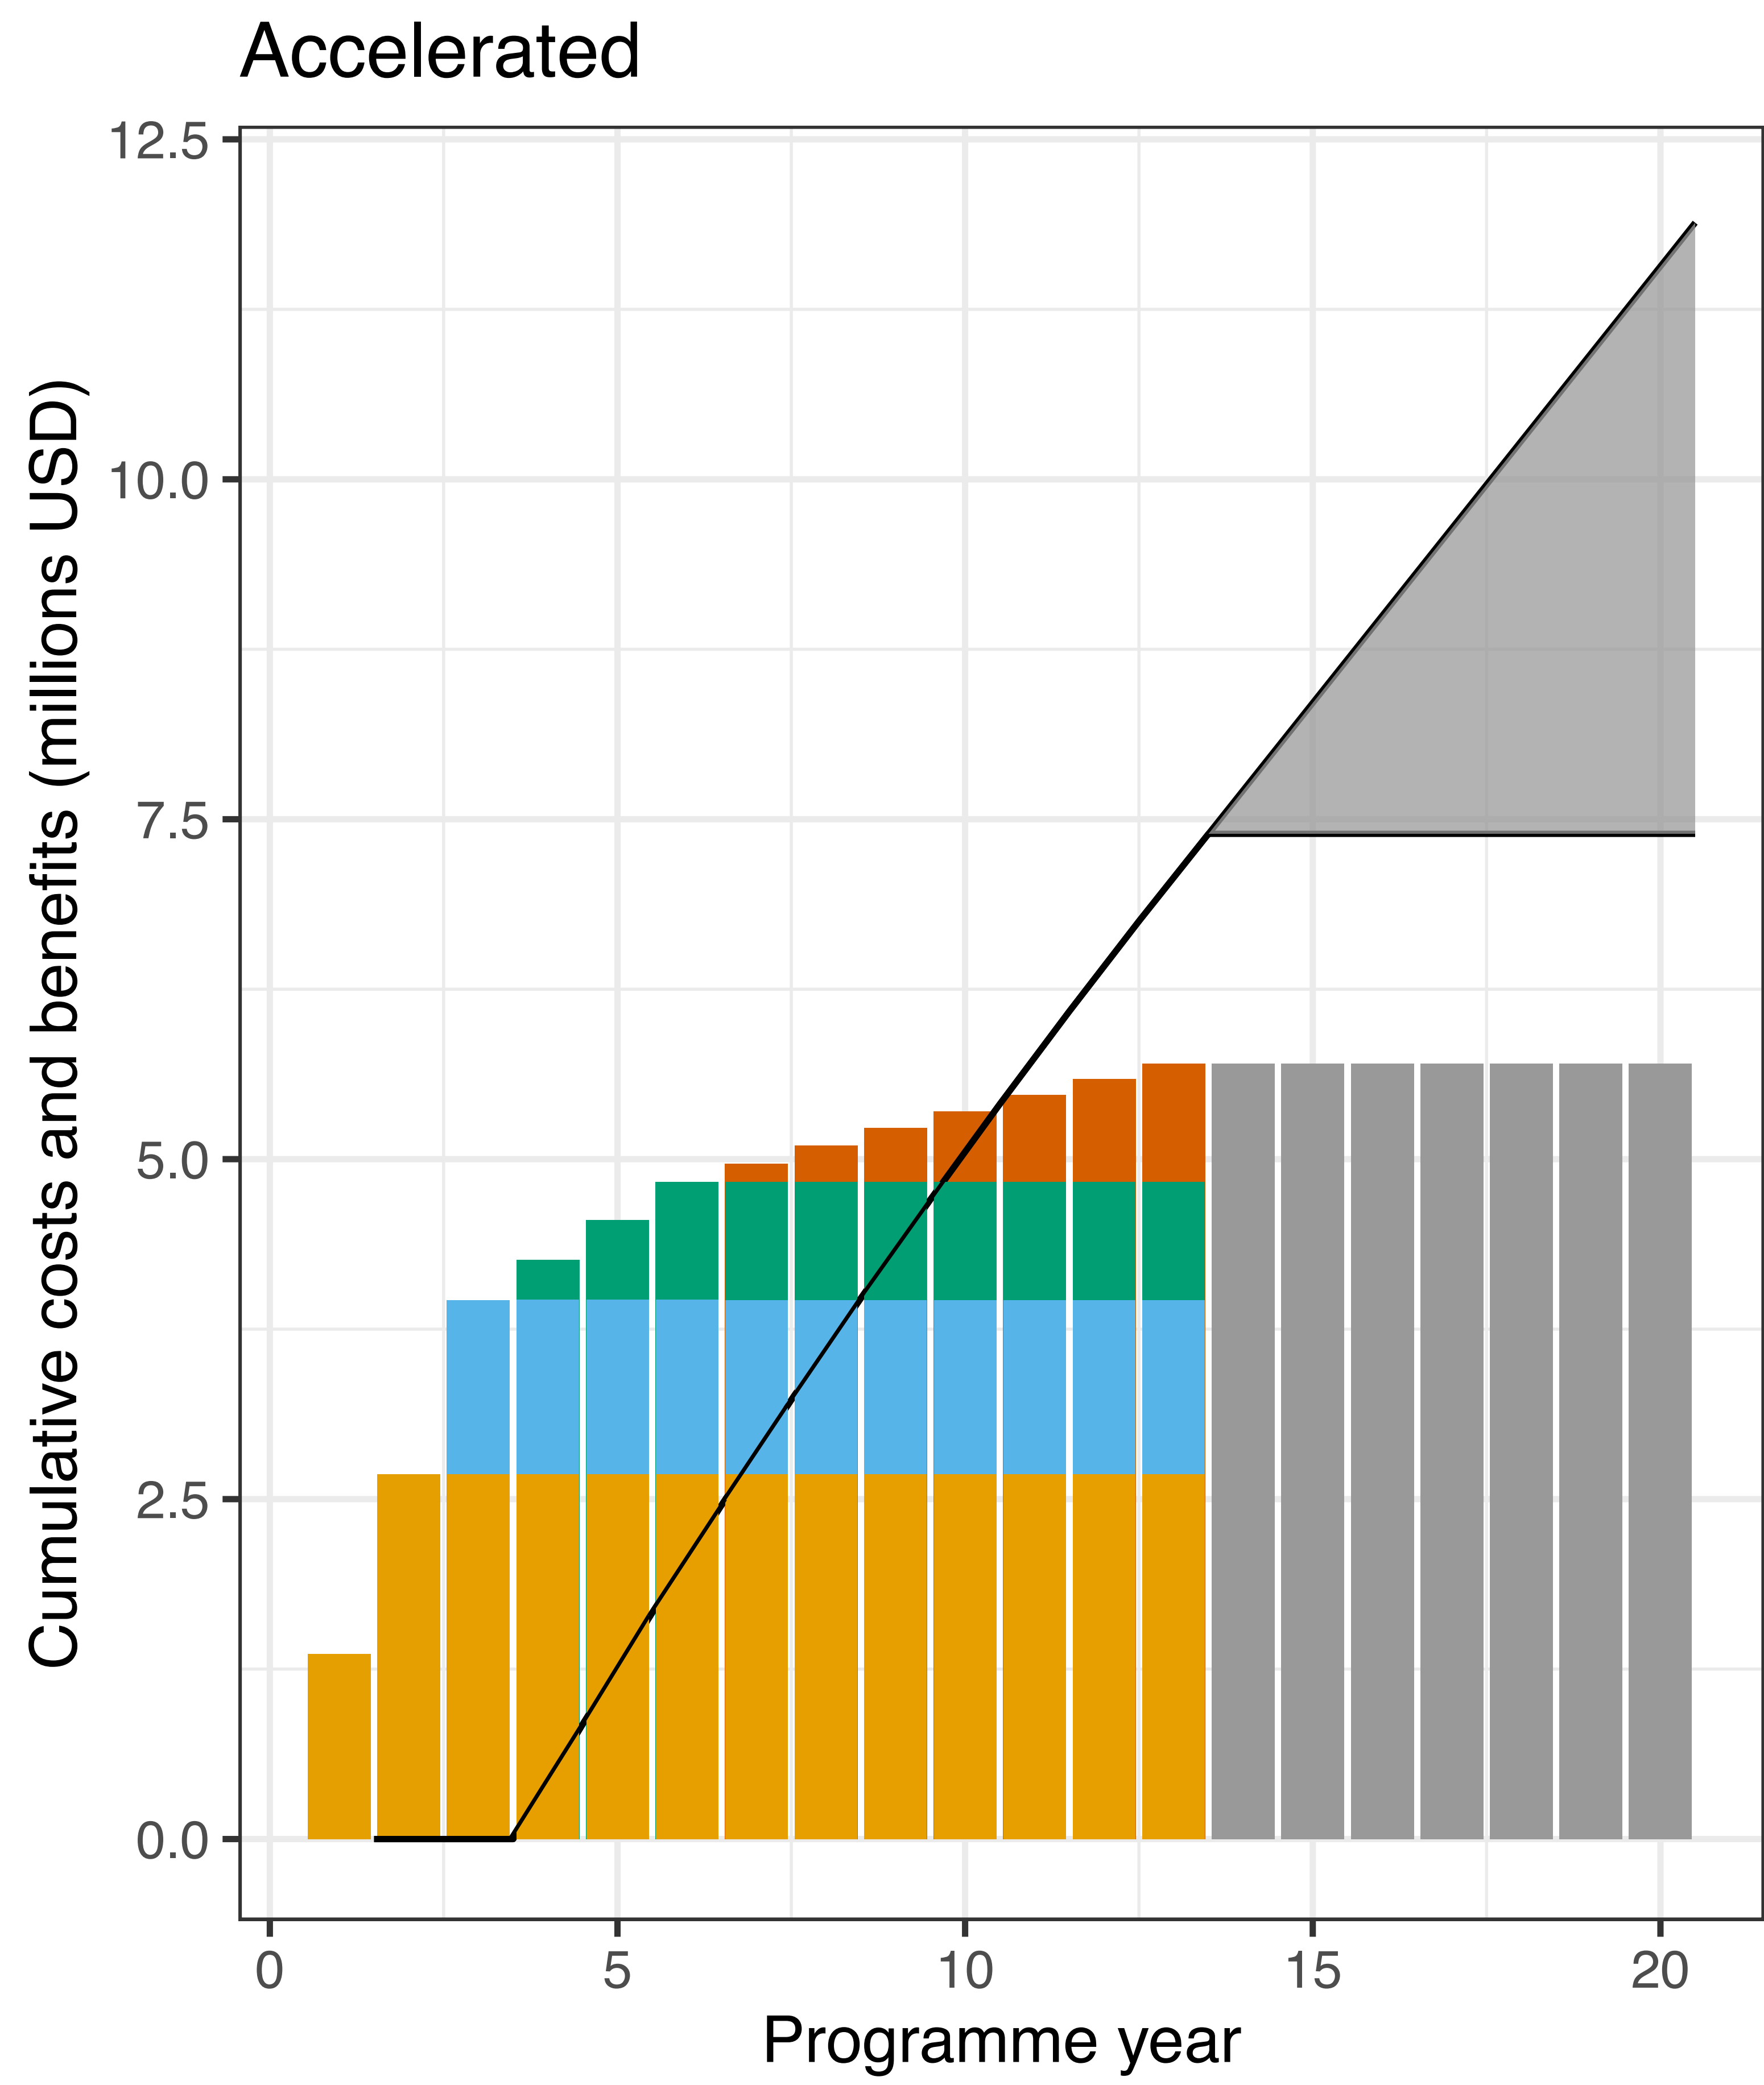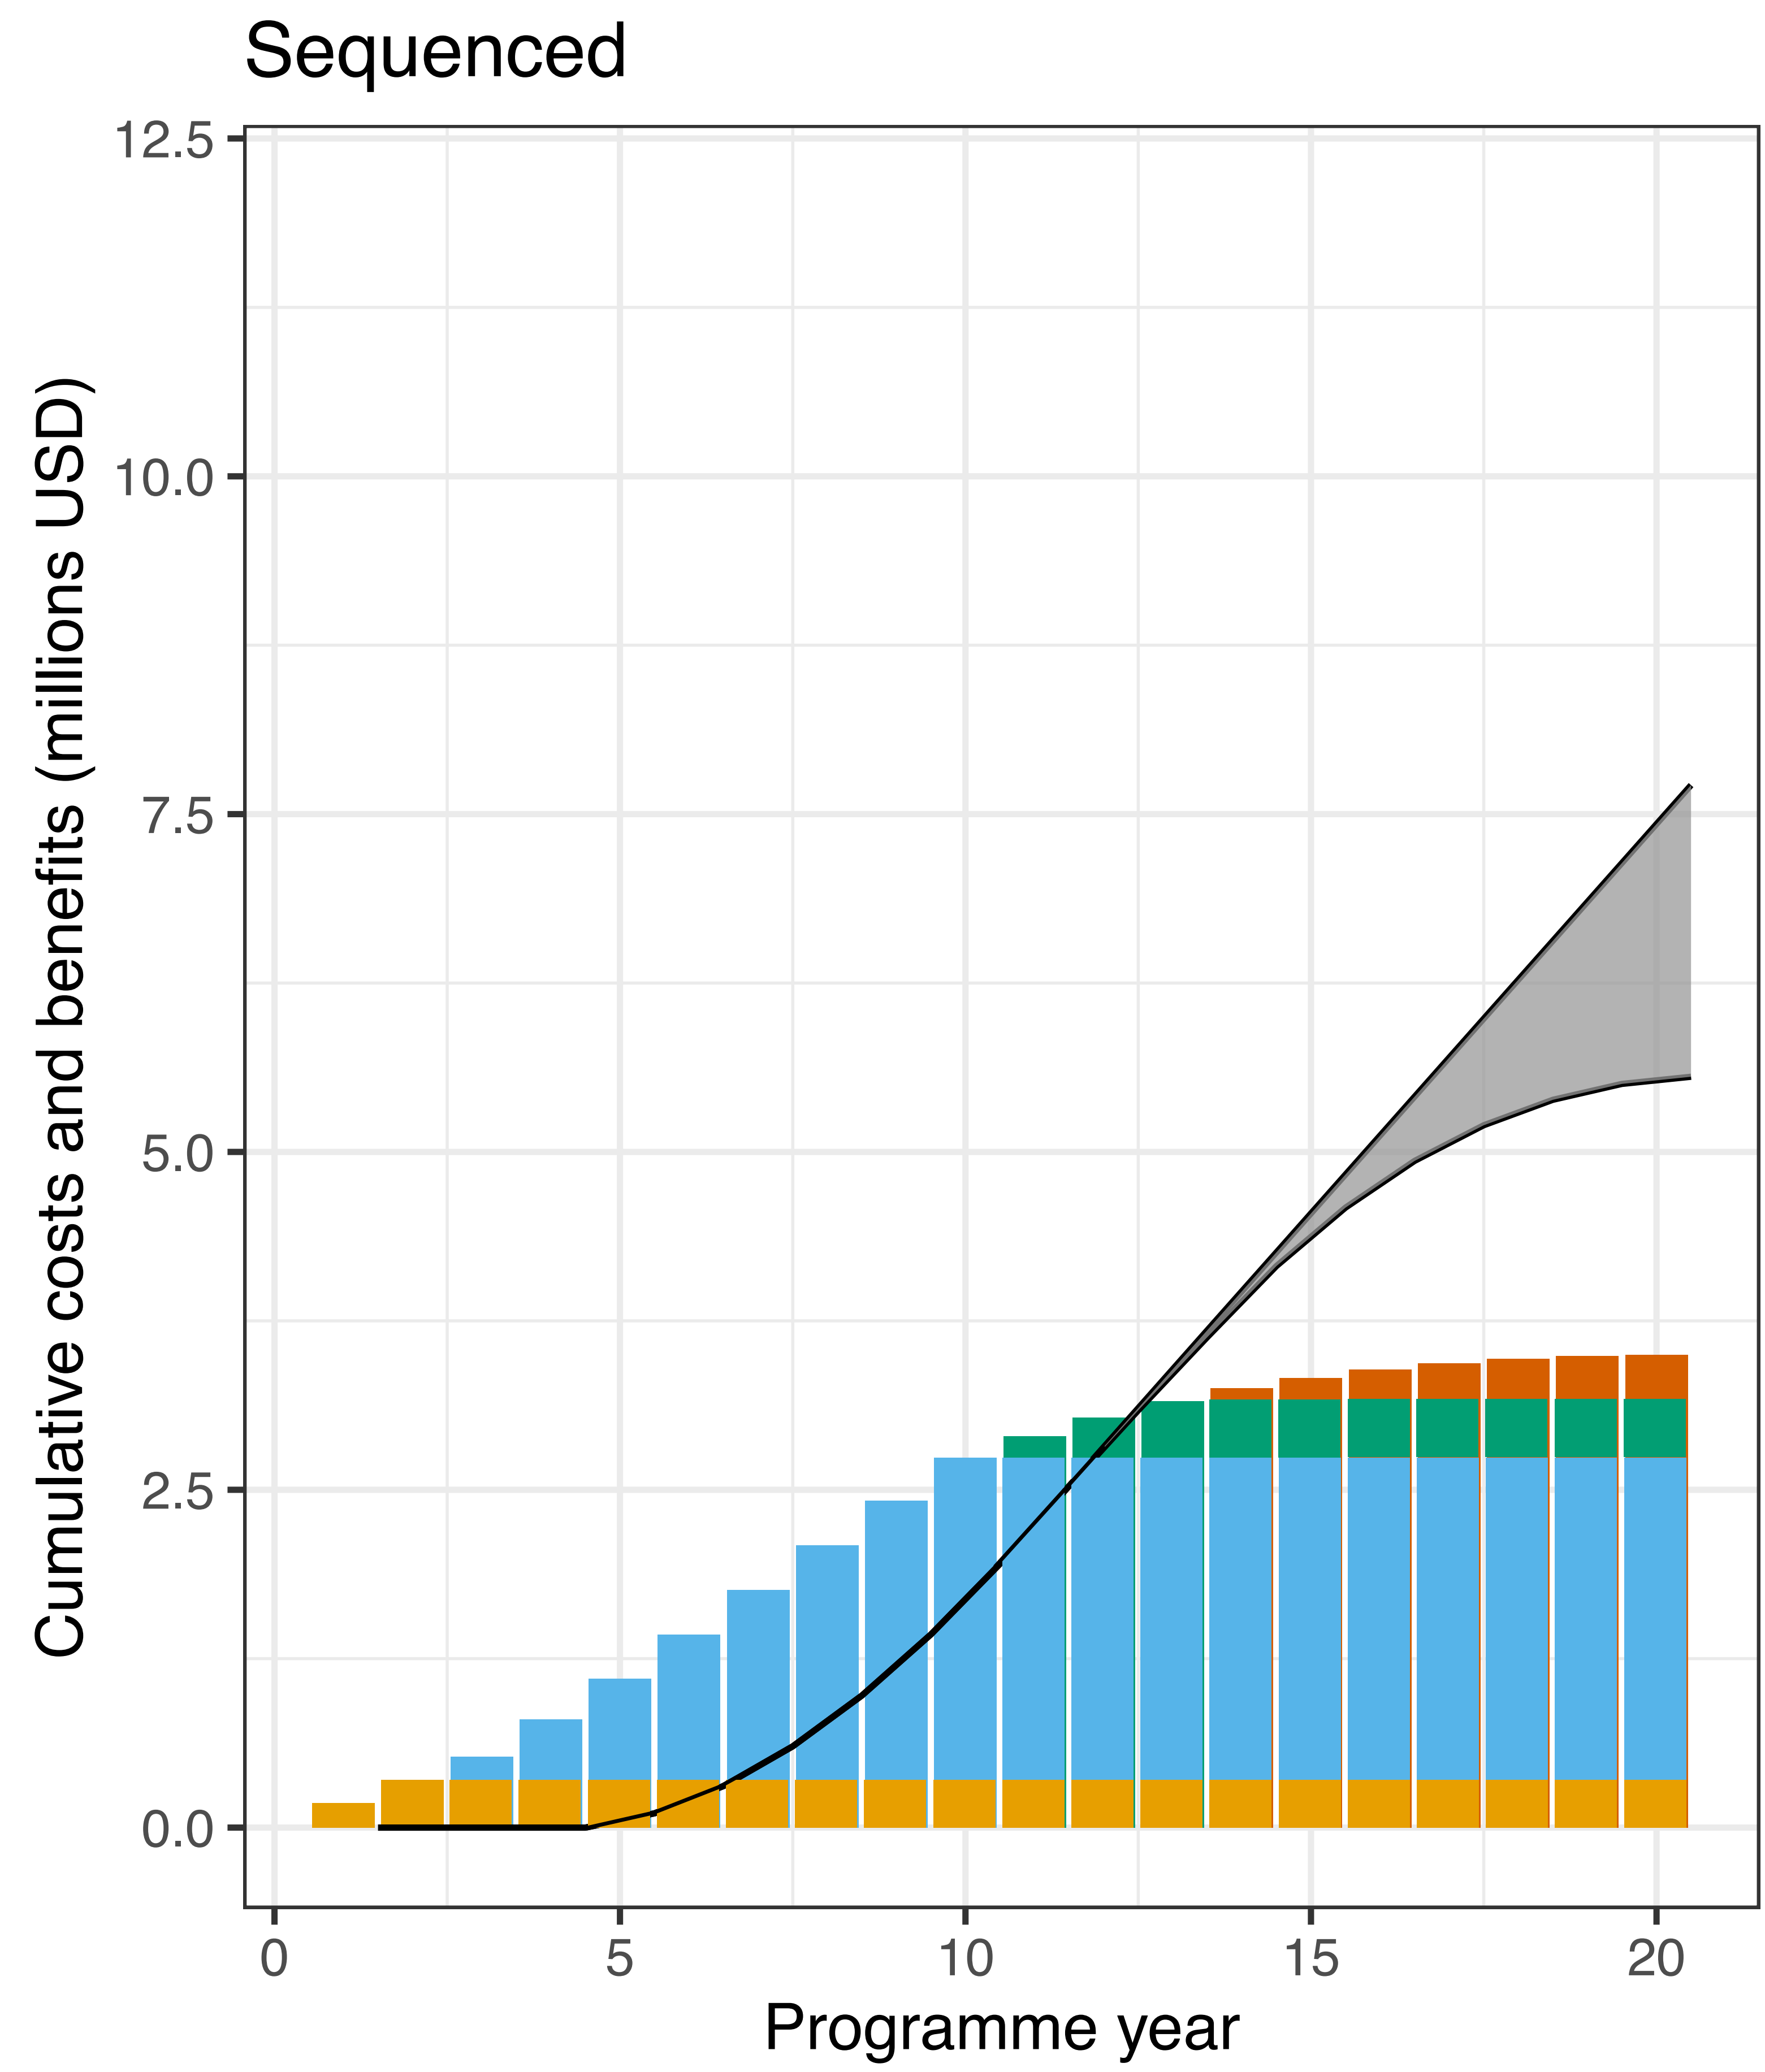

Programme phase

- Set up
- Release
- Short term release
- Long term release

- Uncertainty
- Benefits

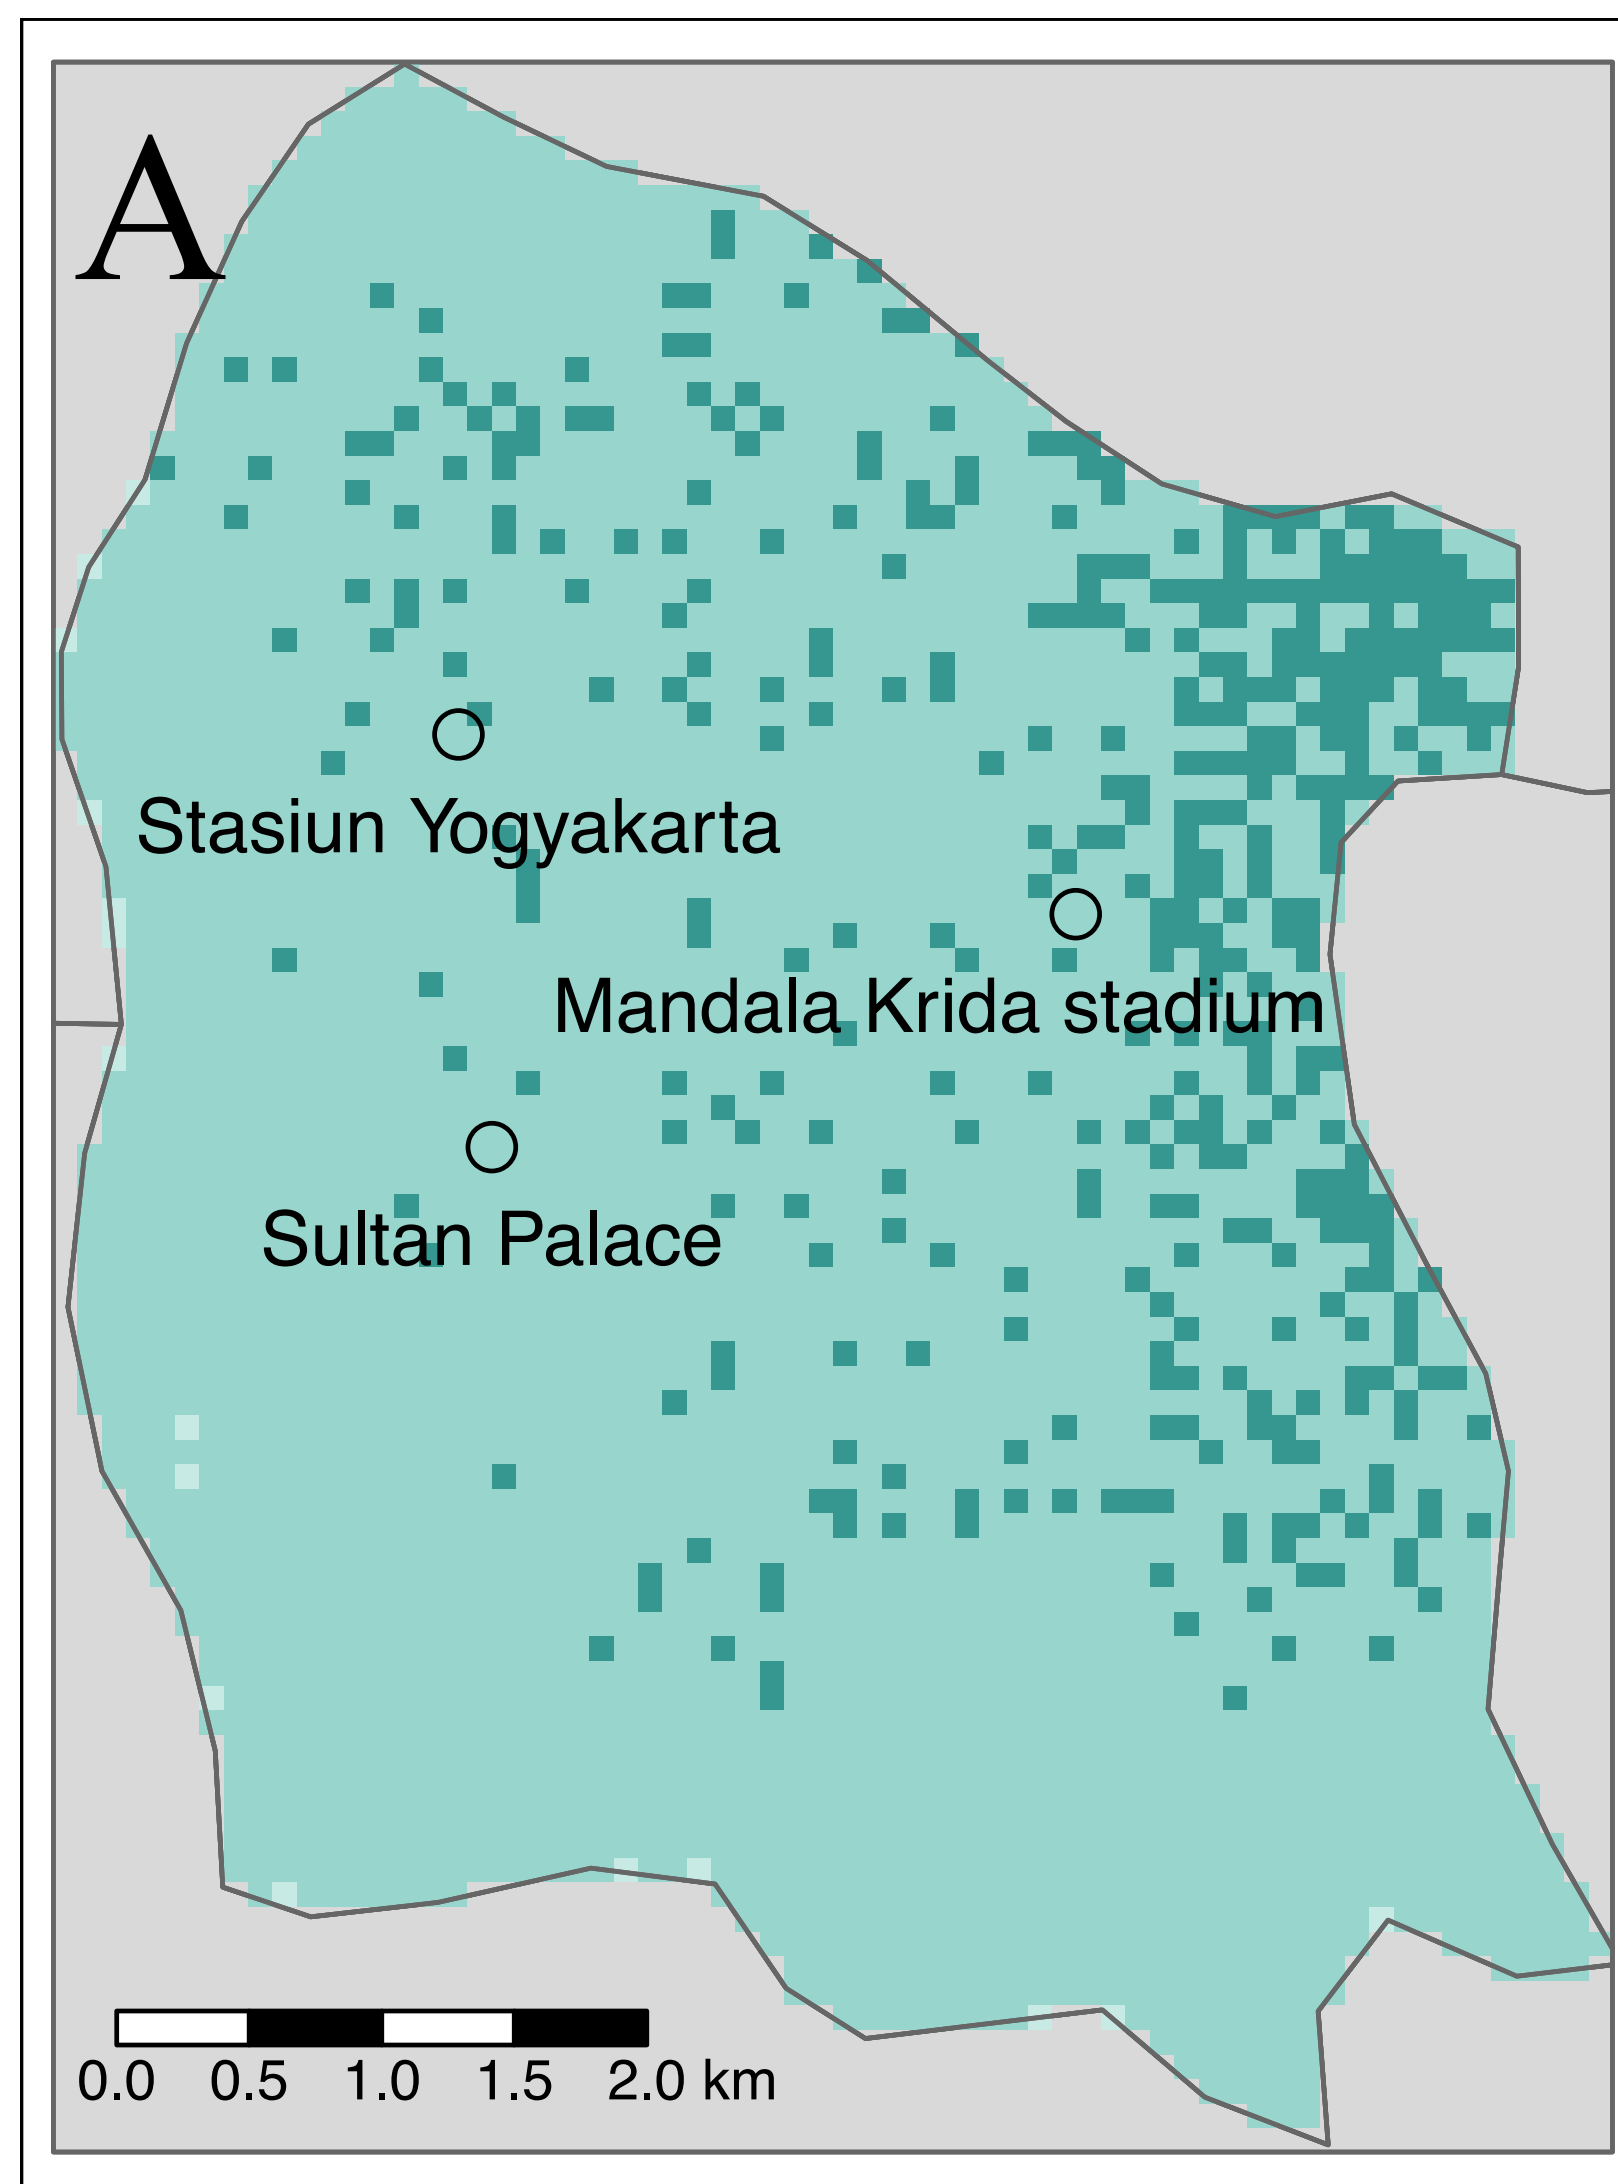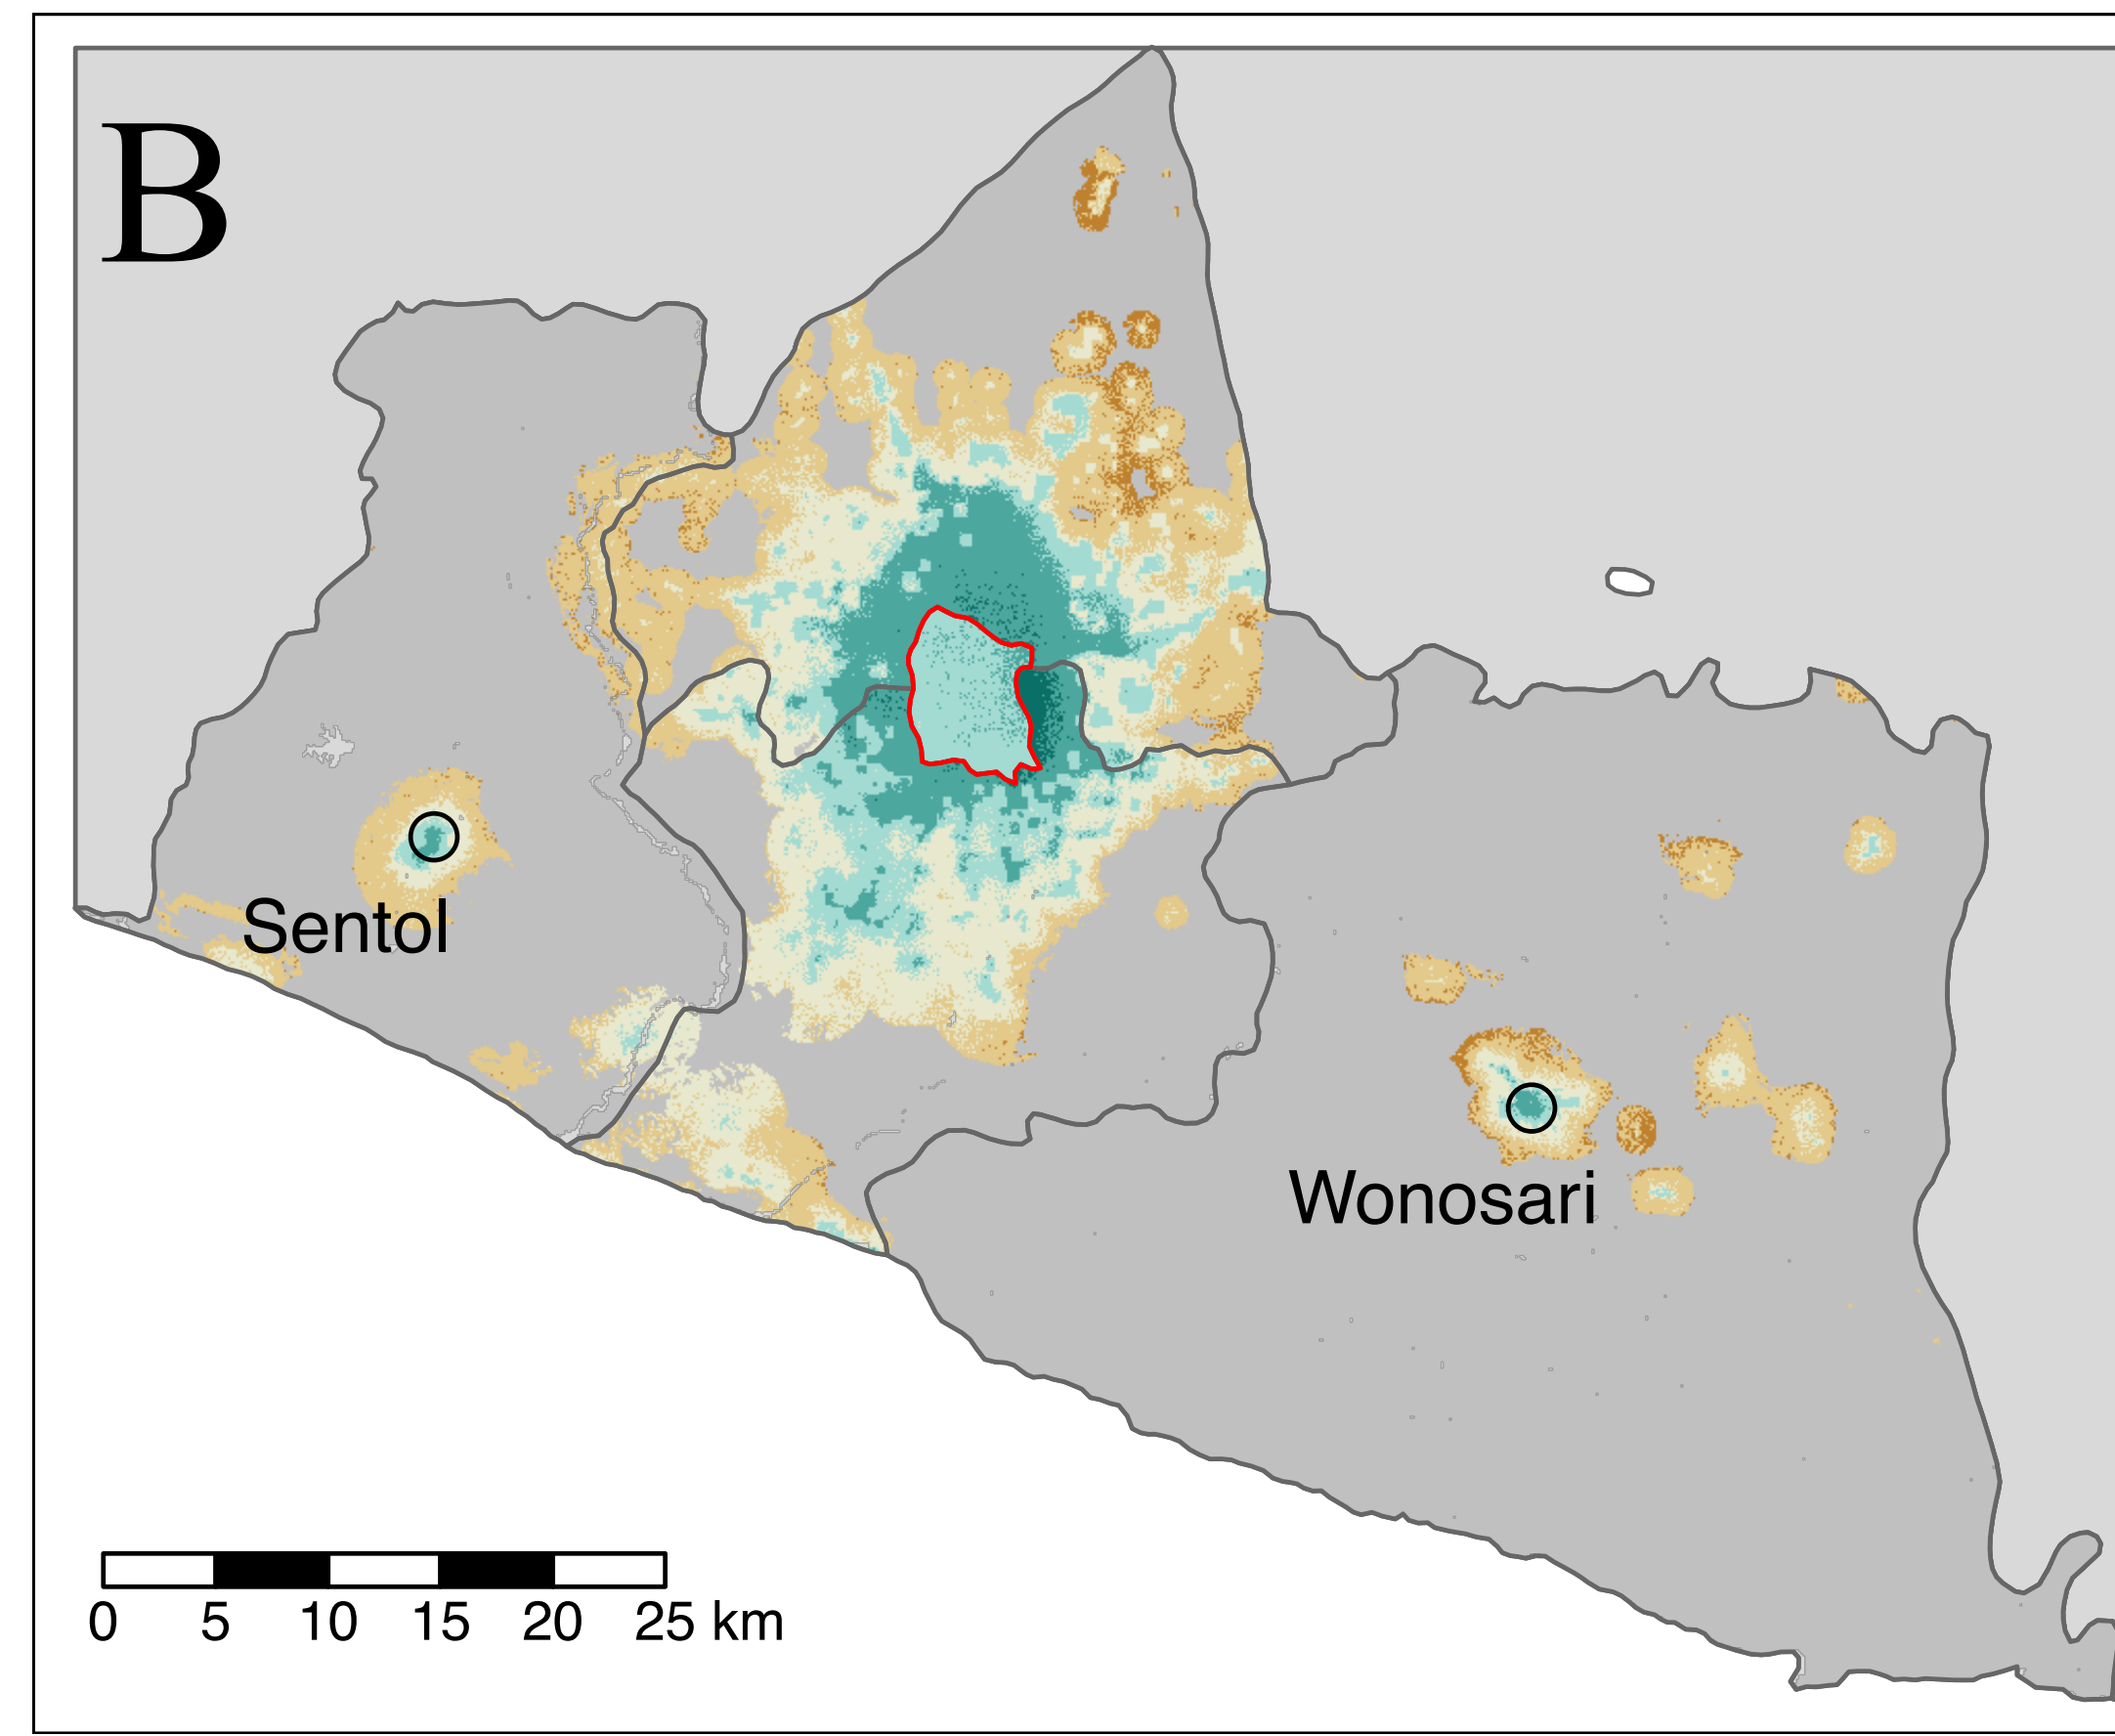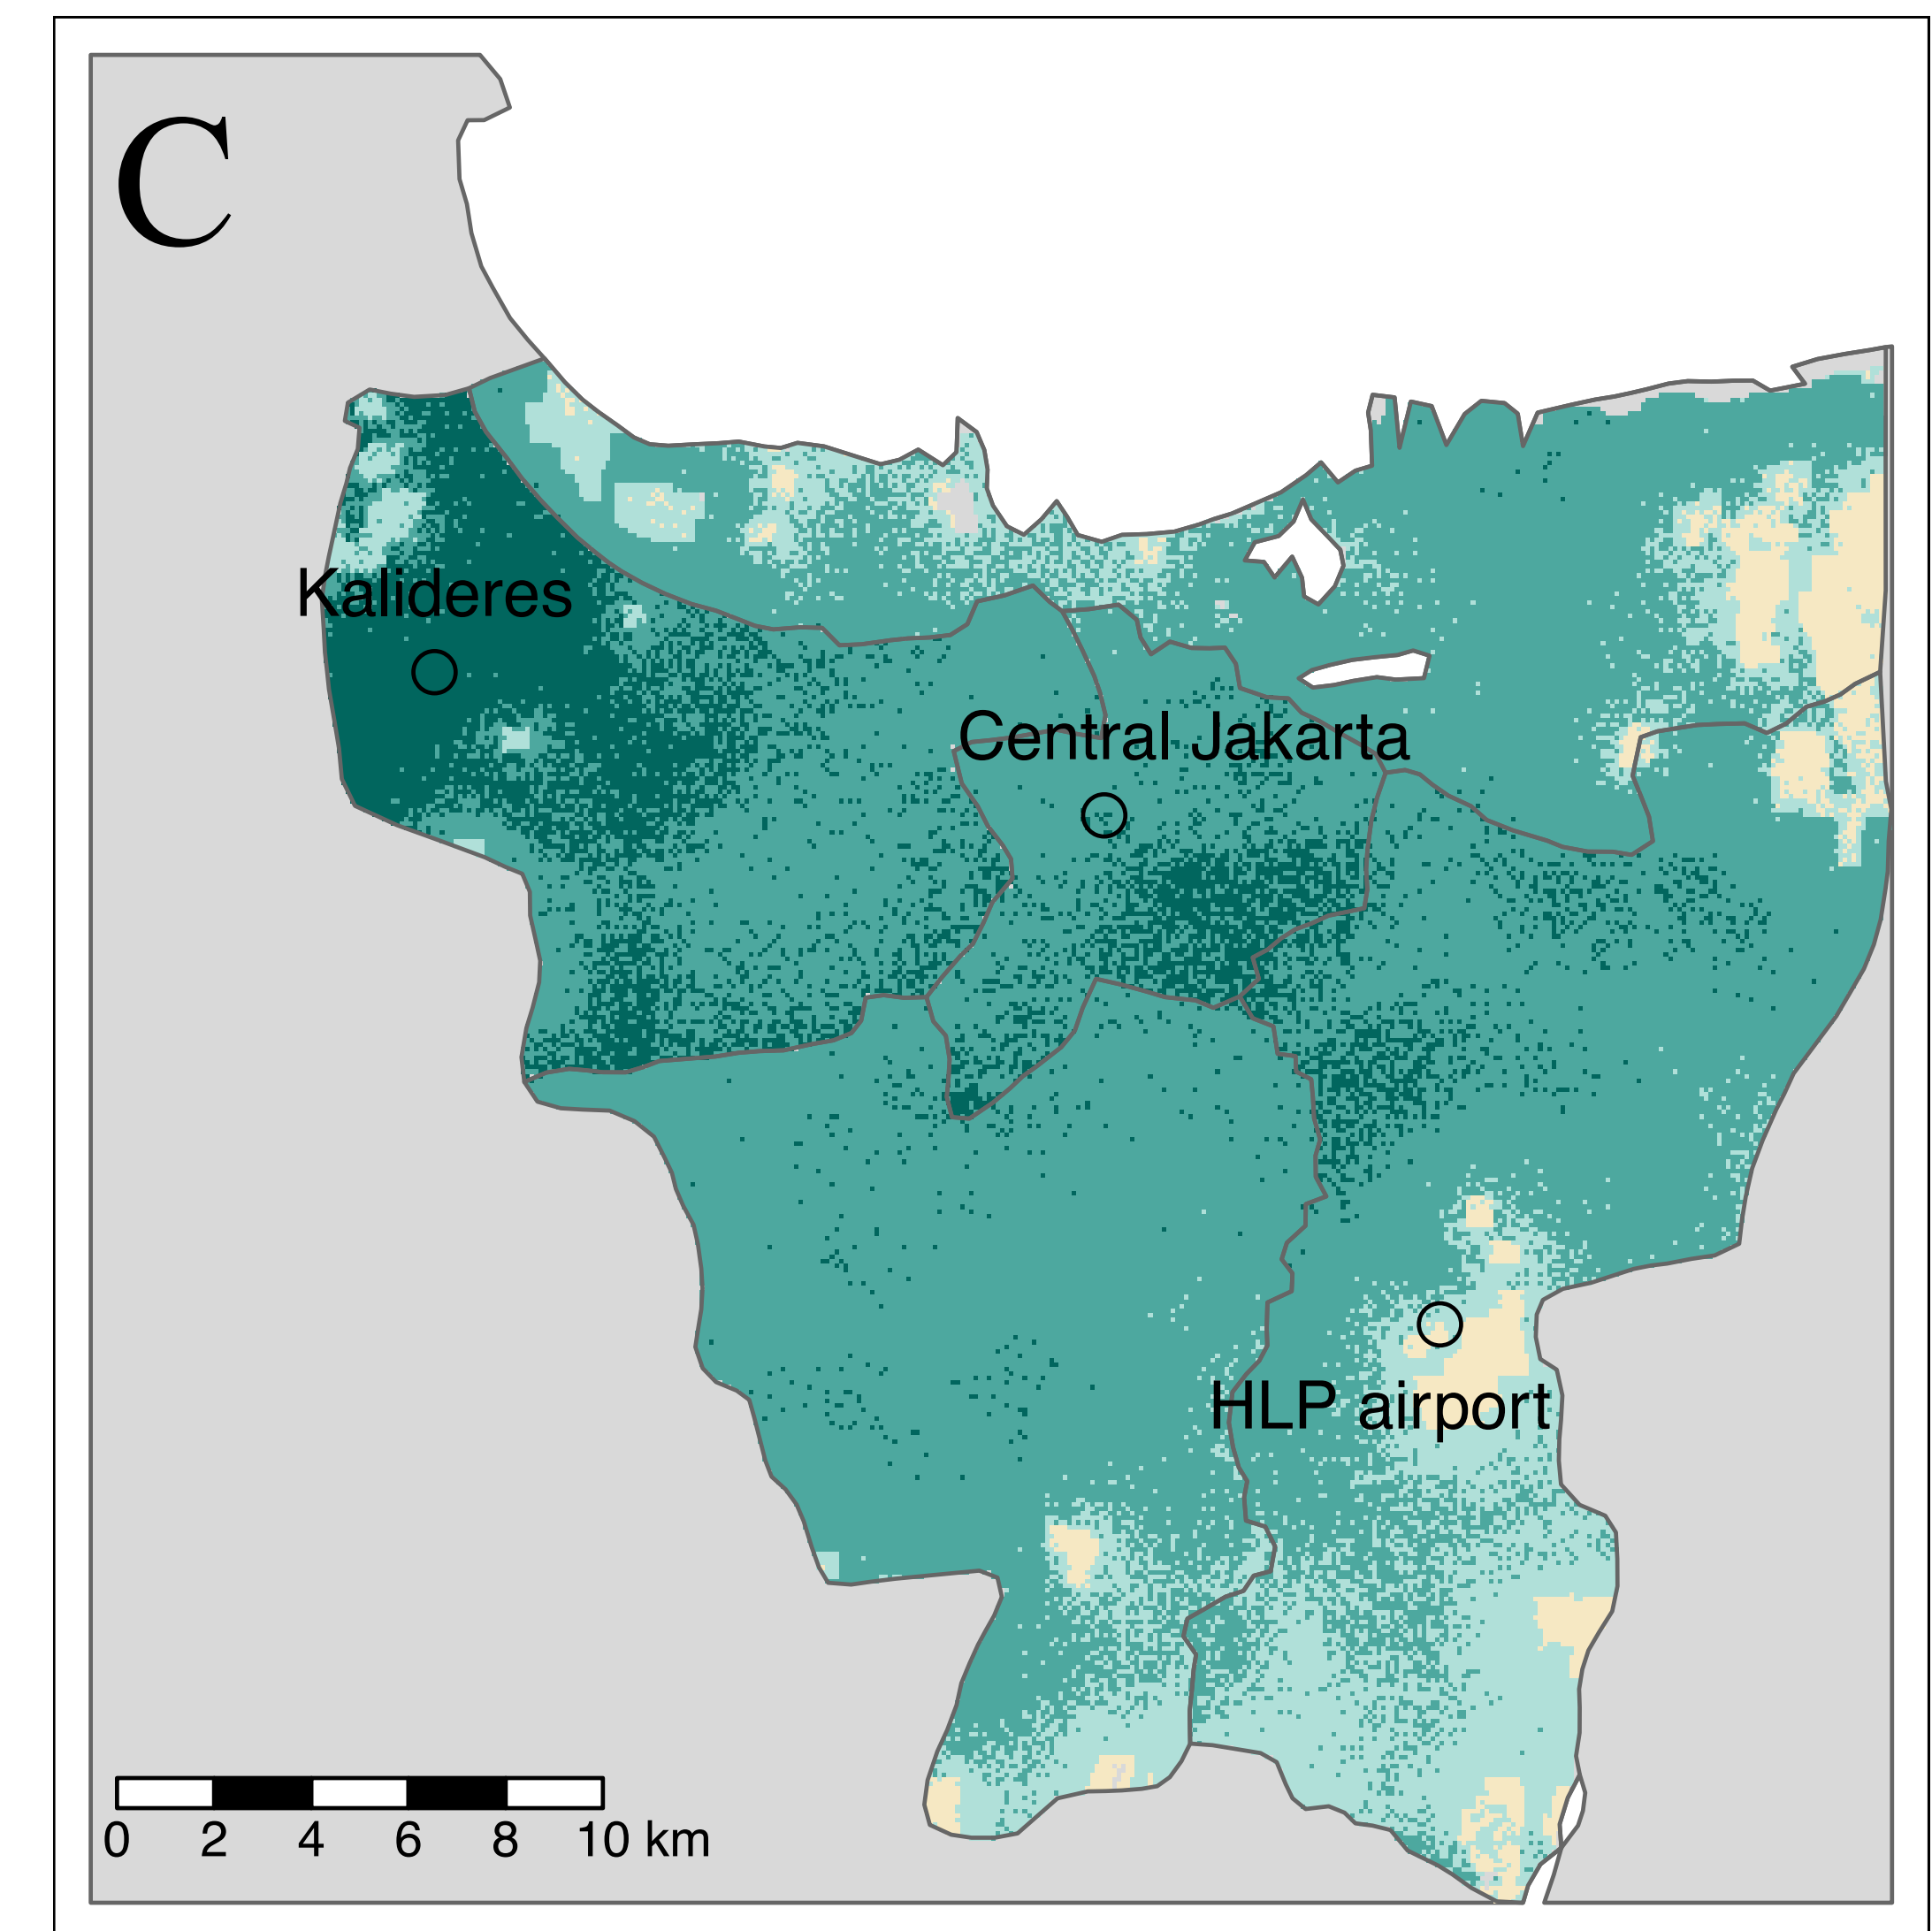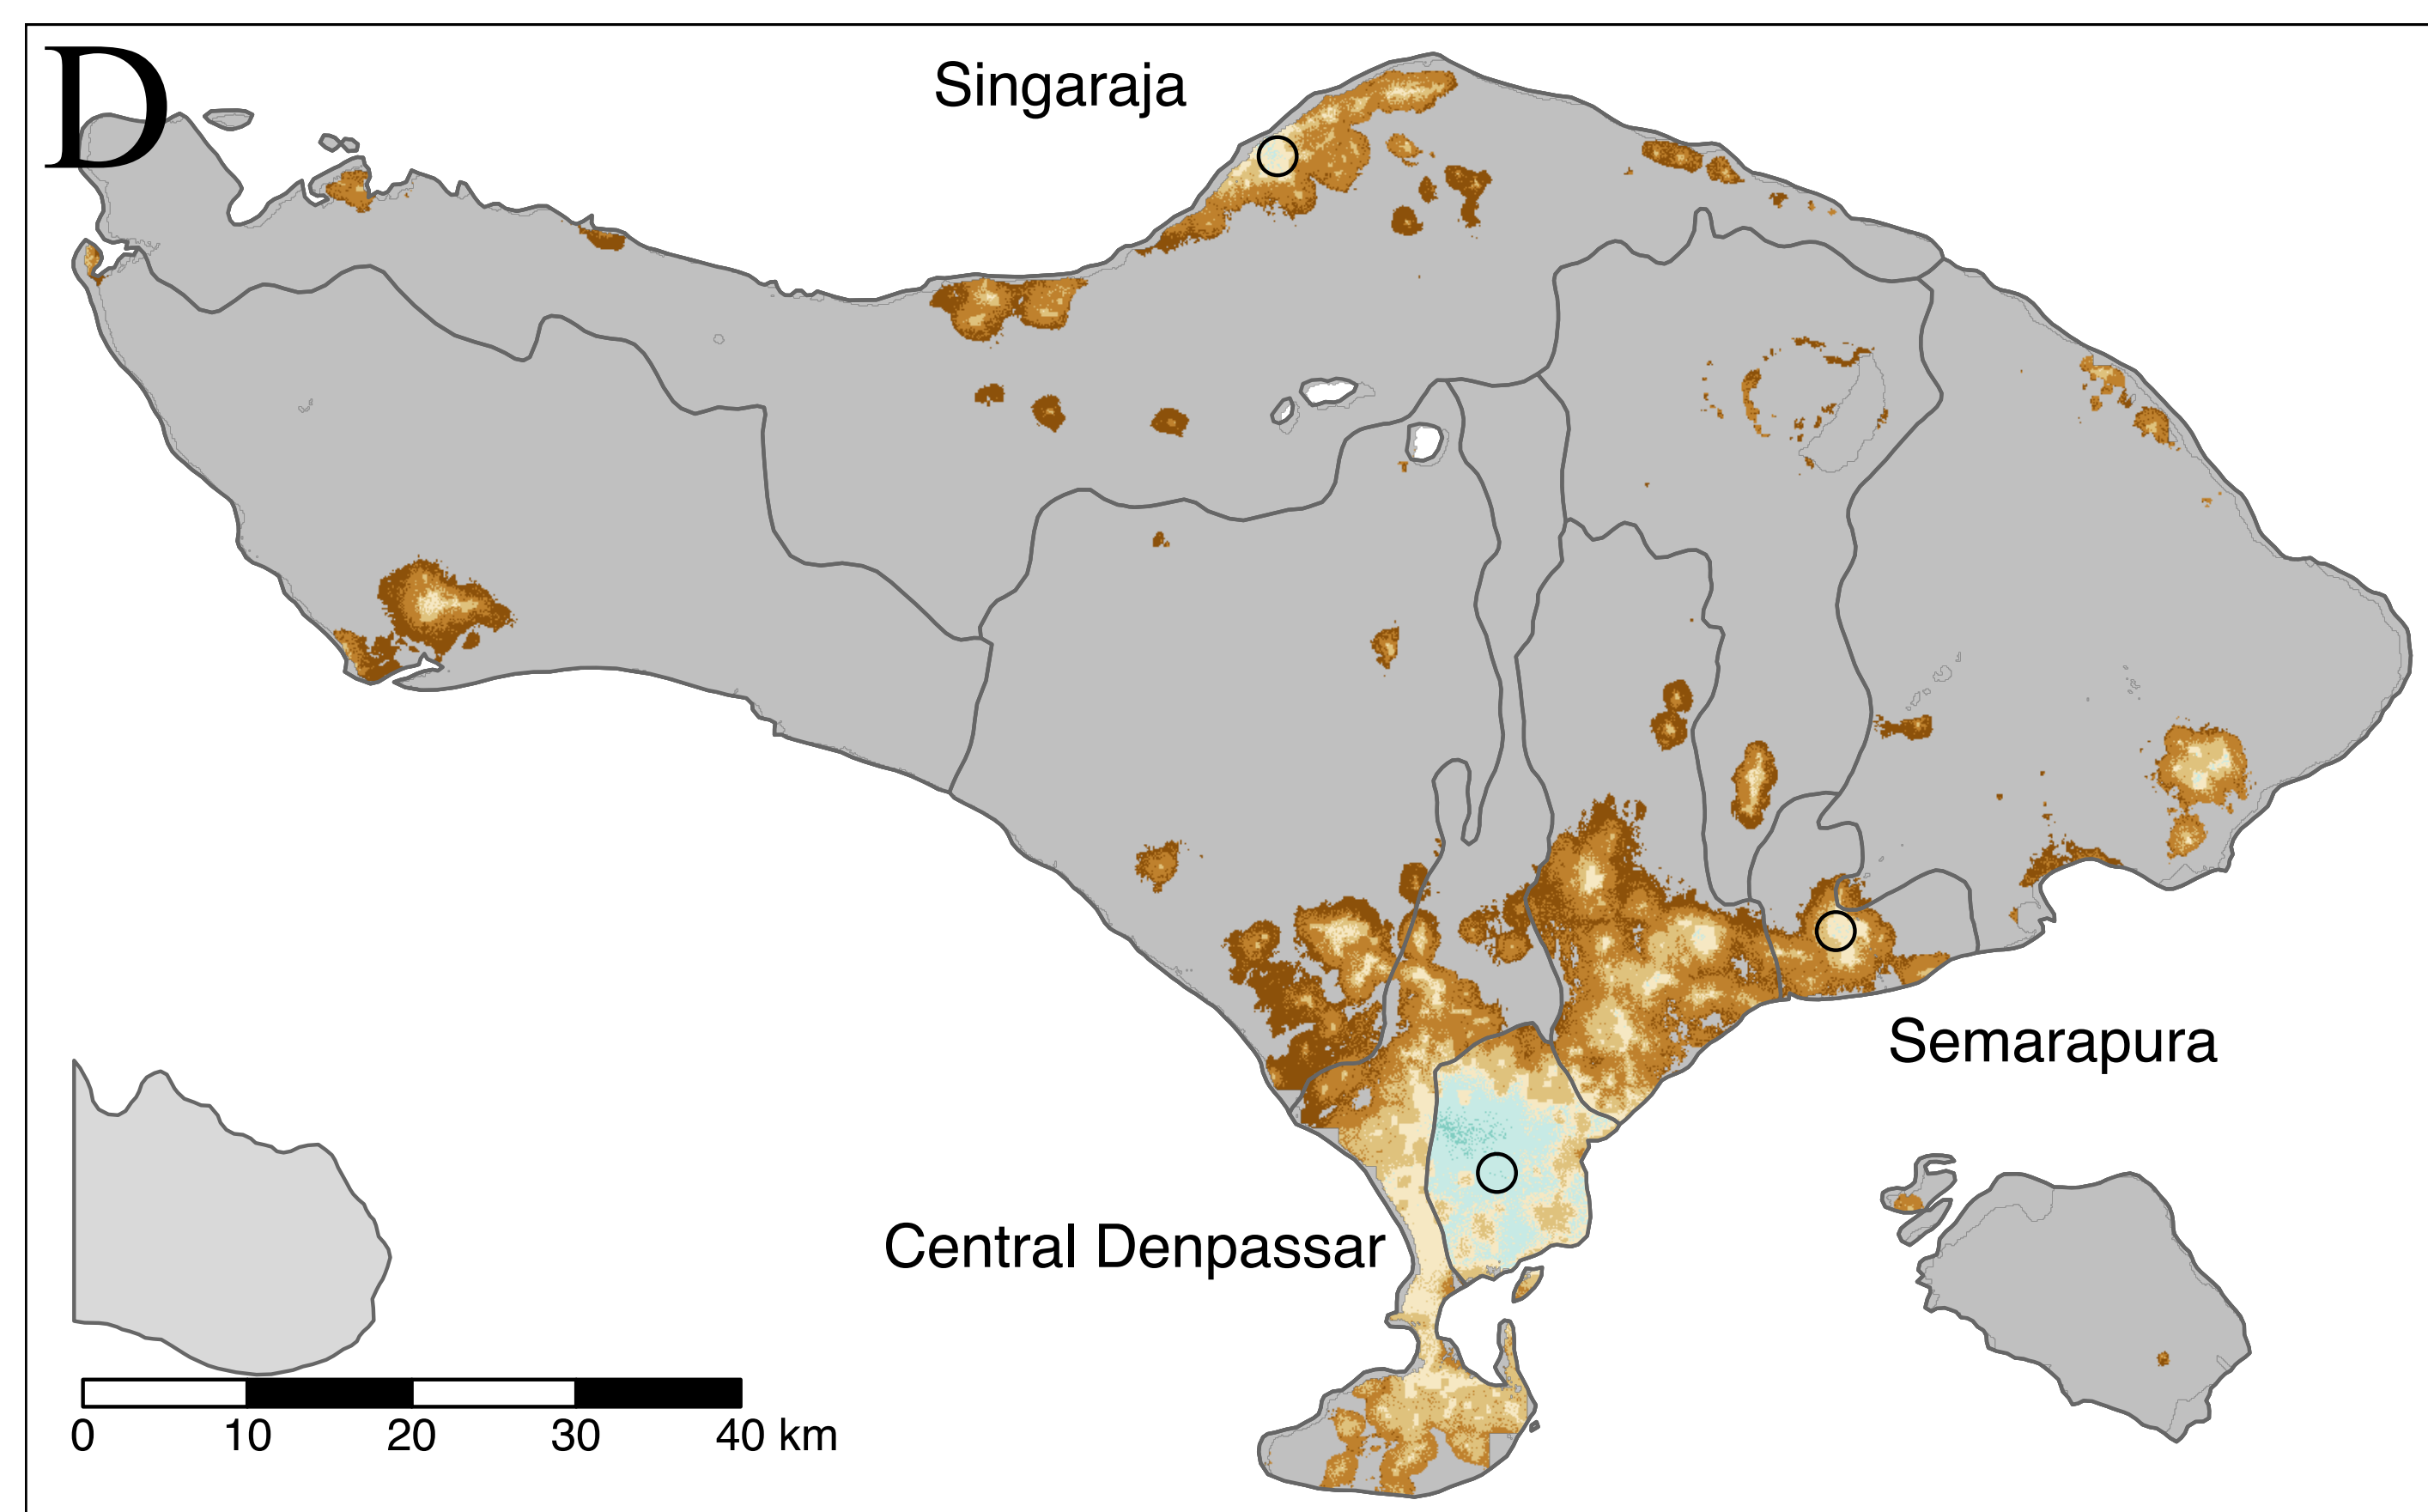

Gross cost effectiveness  
(USD per DALY averted)

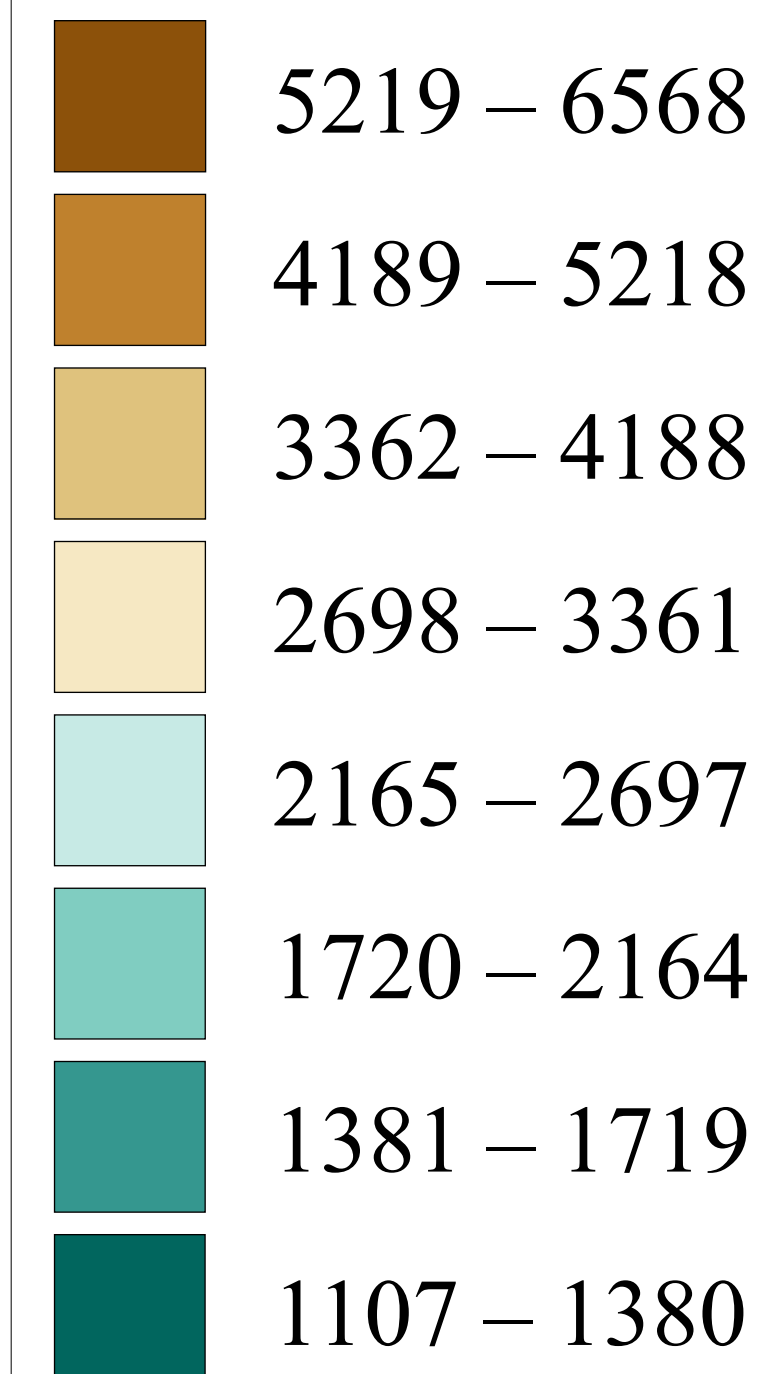

Population density  
<1,000 people per km<sup>2</sup>

Outside of study area

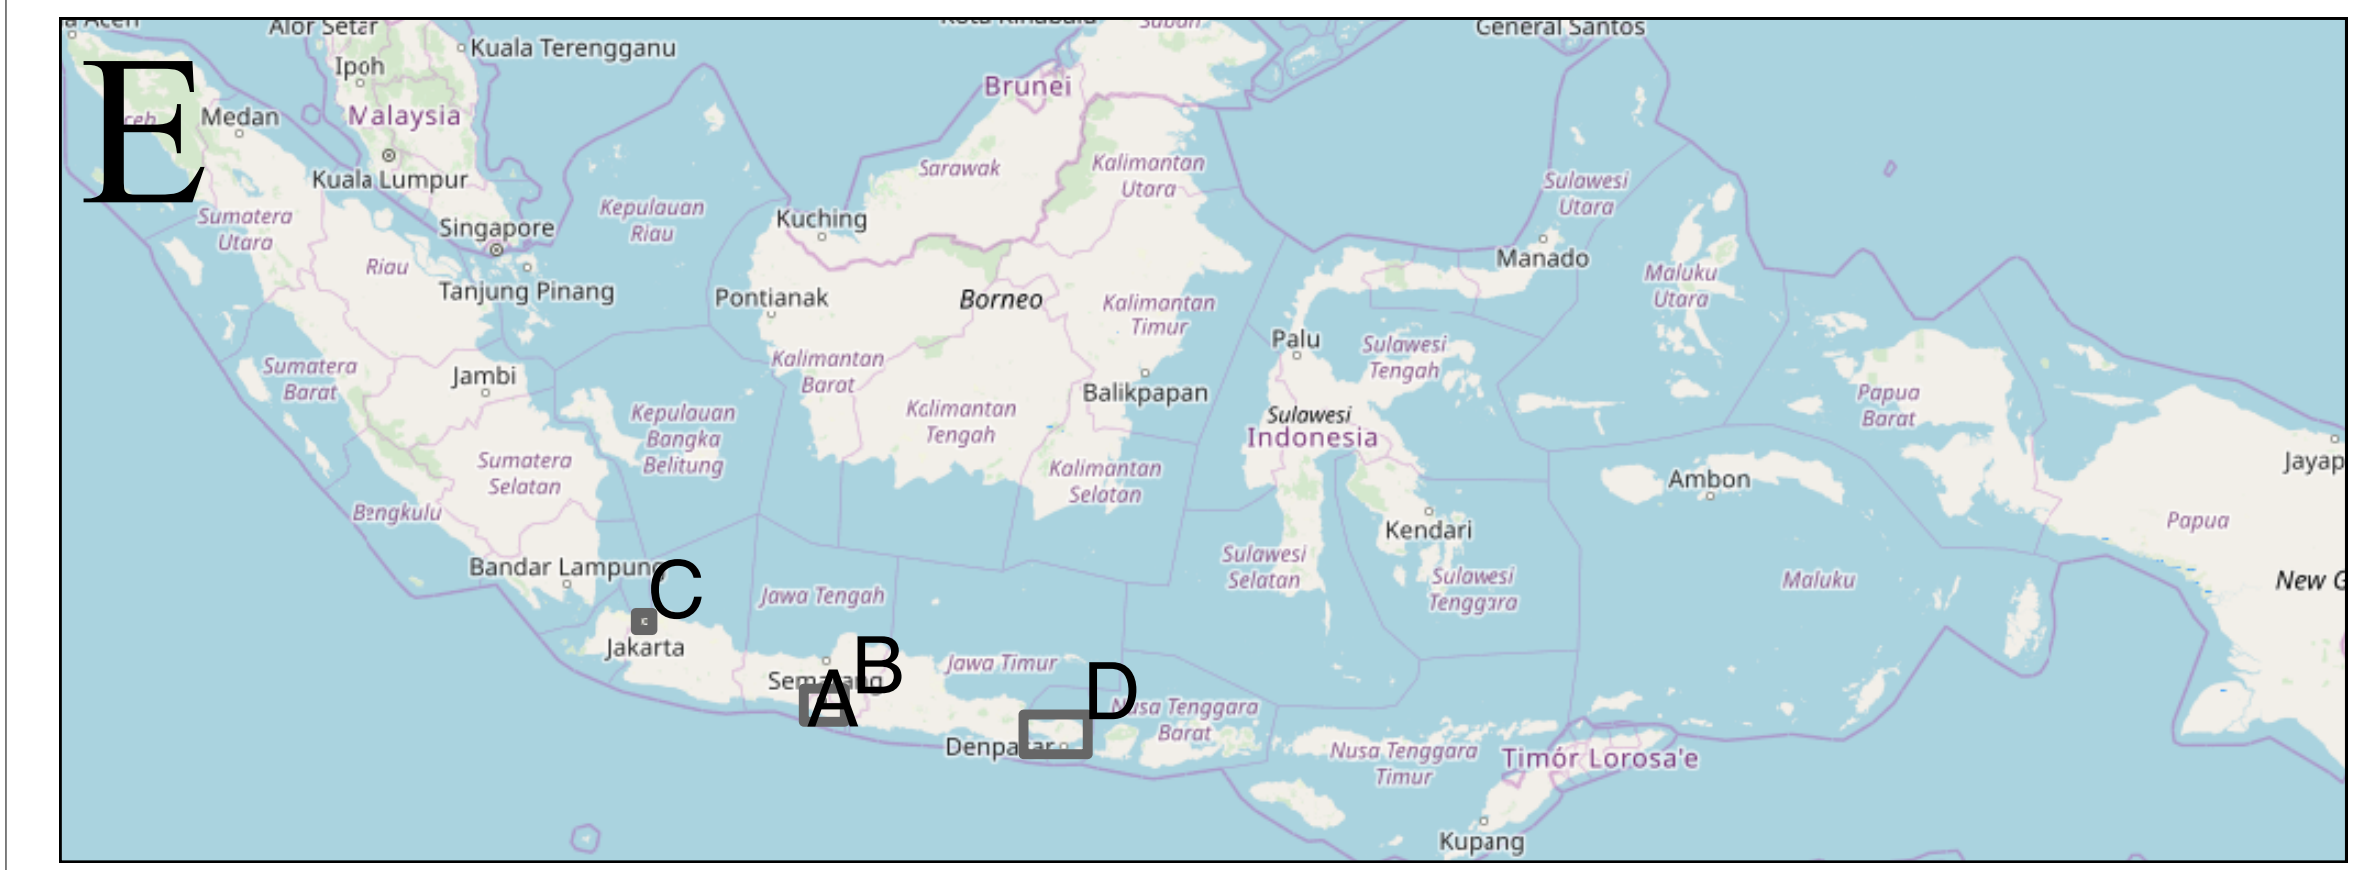

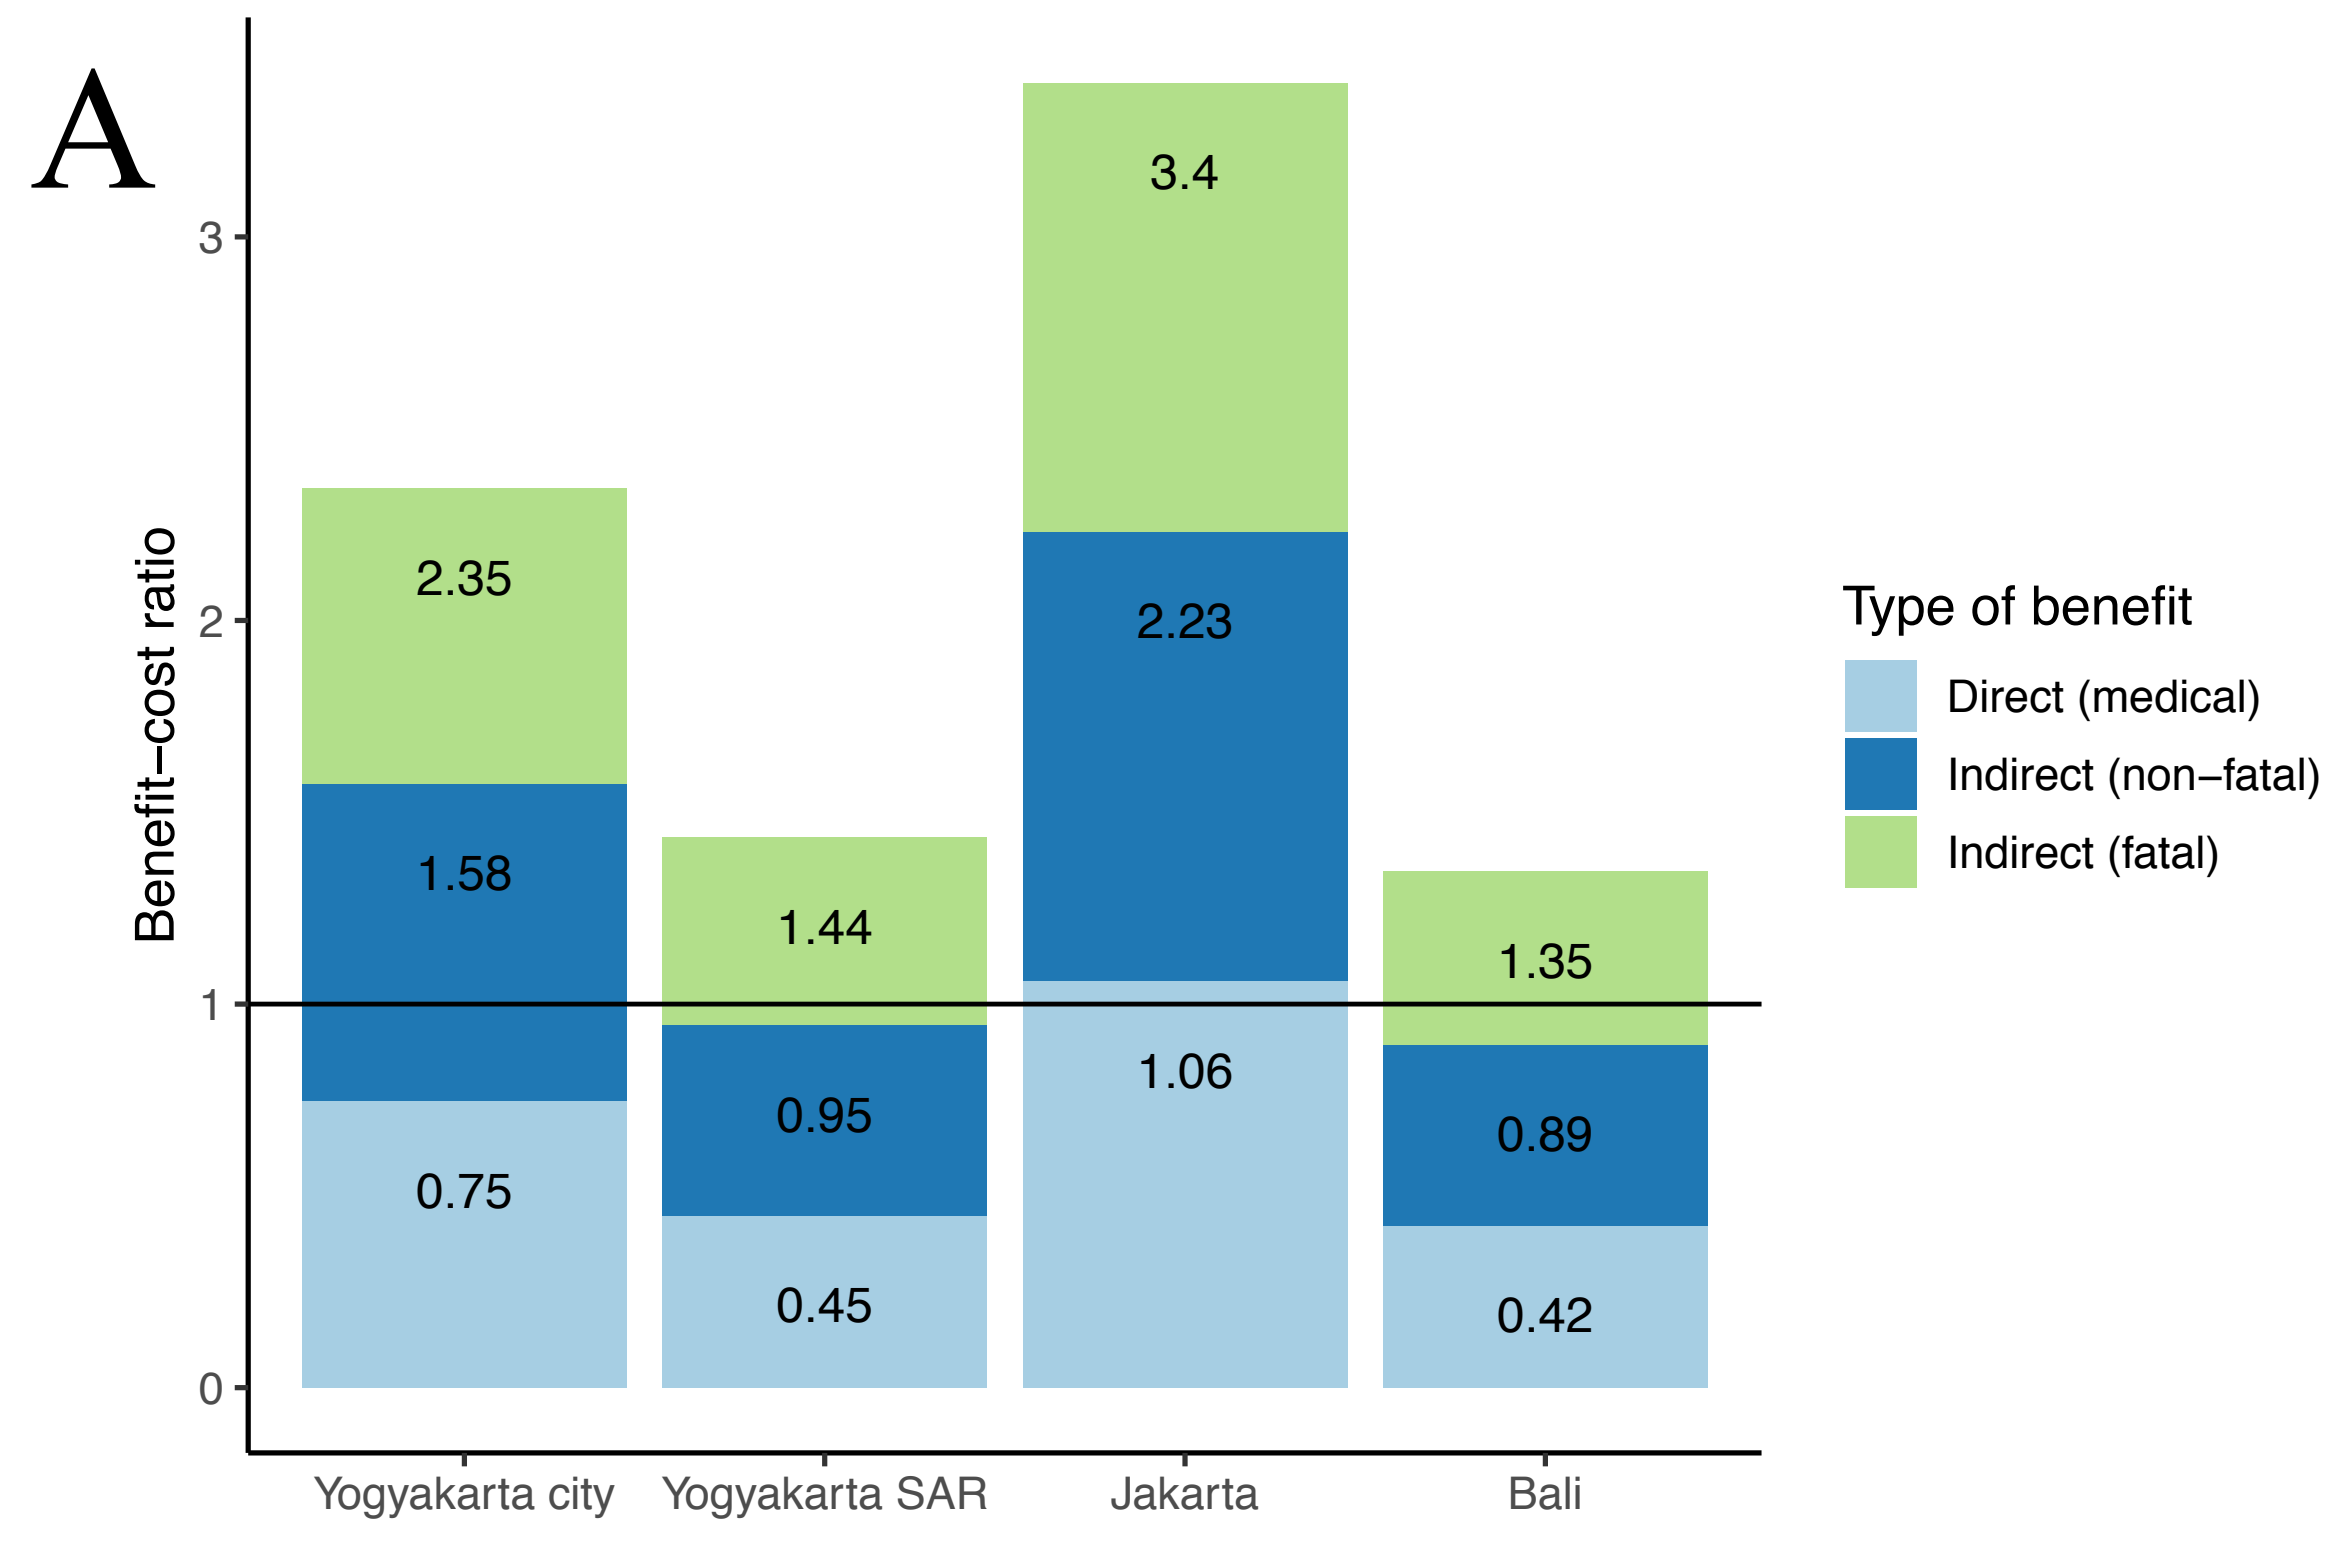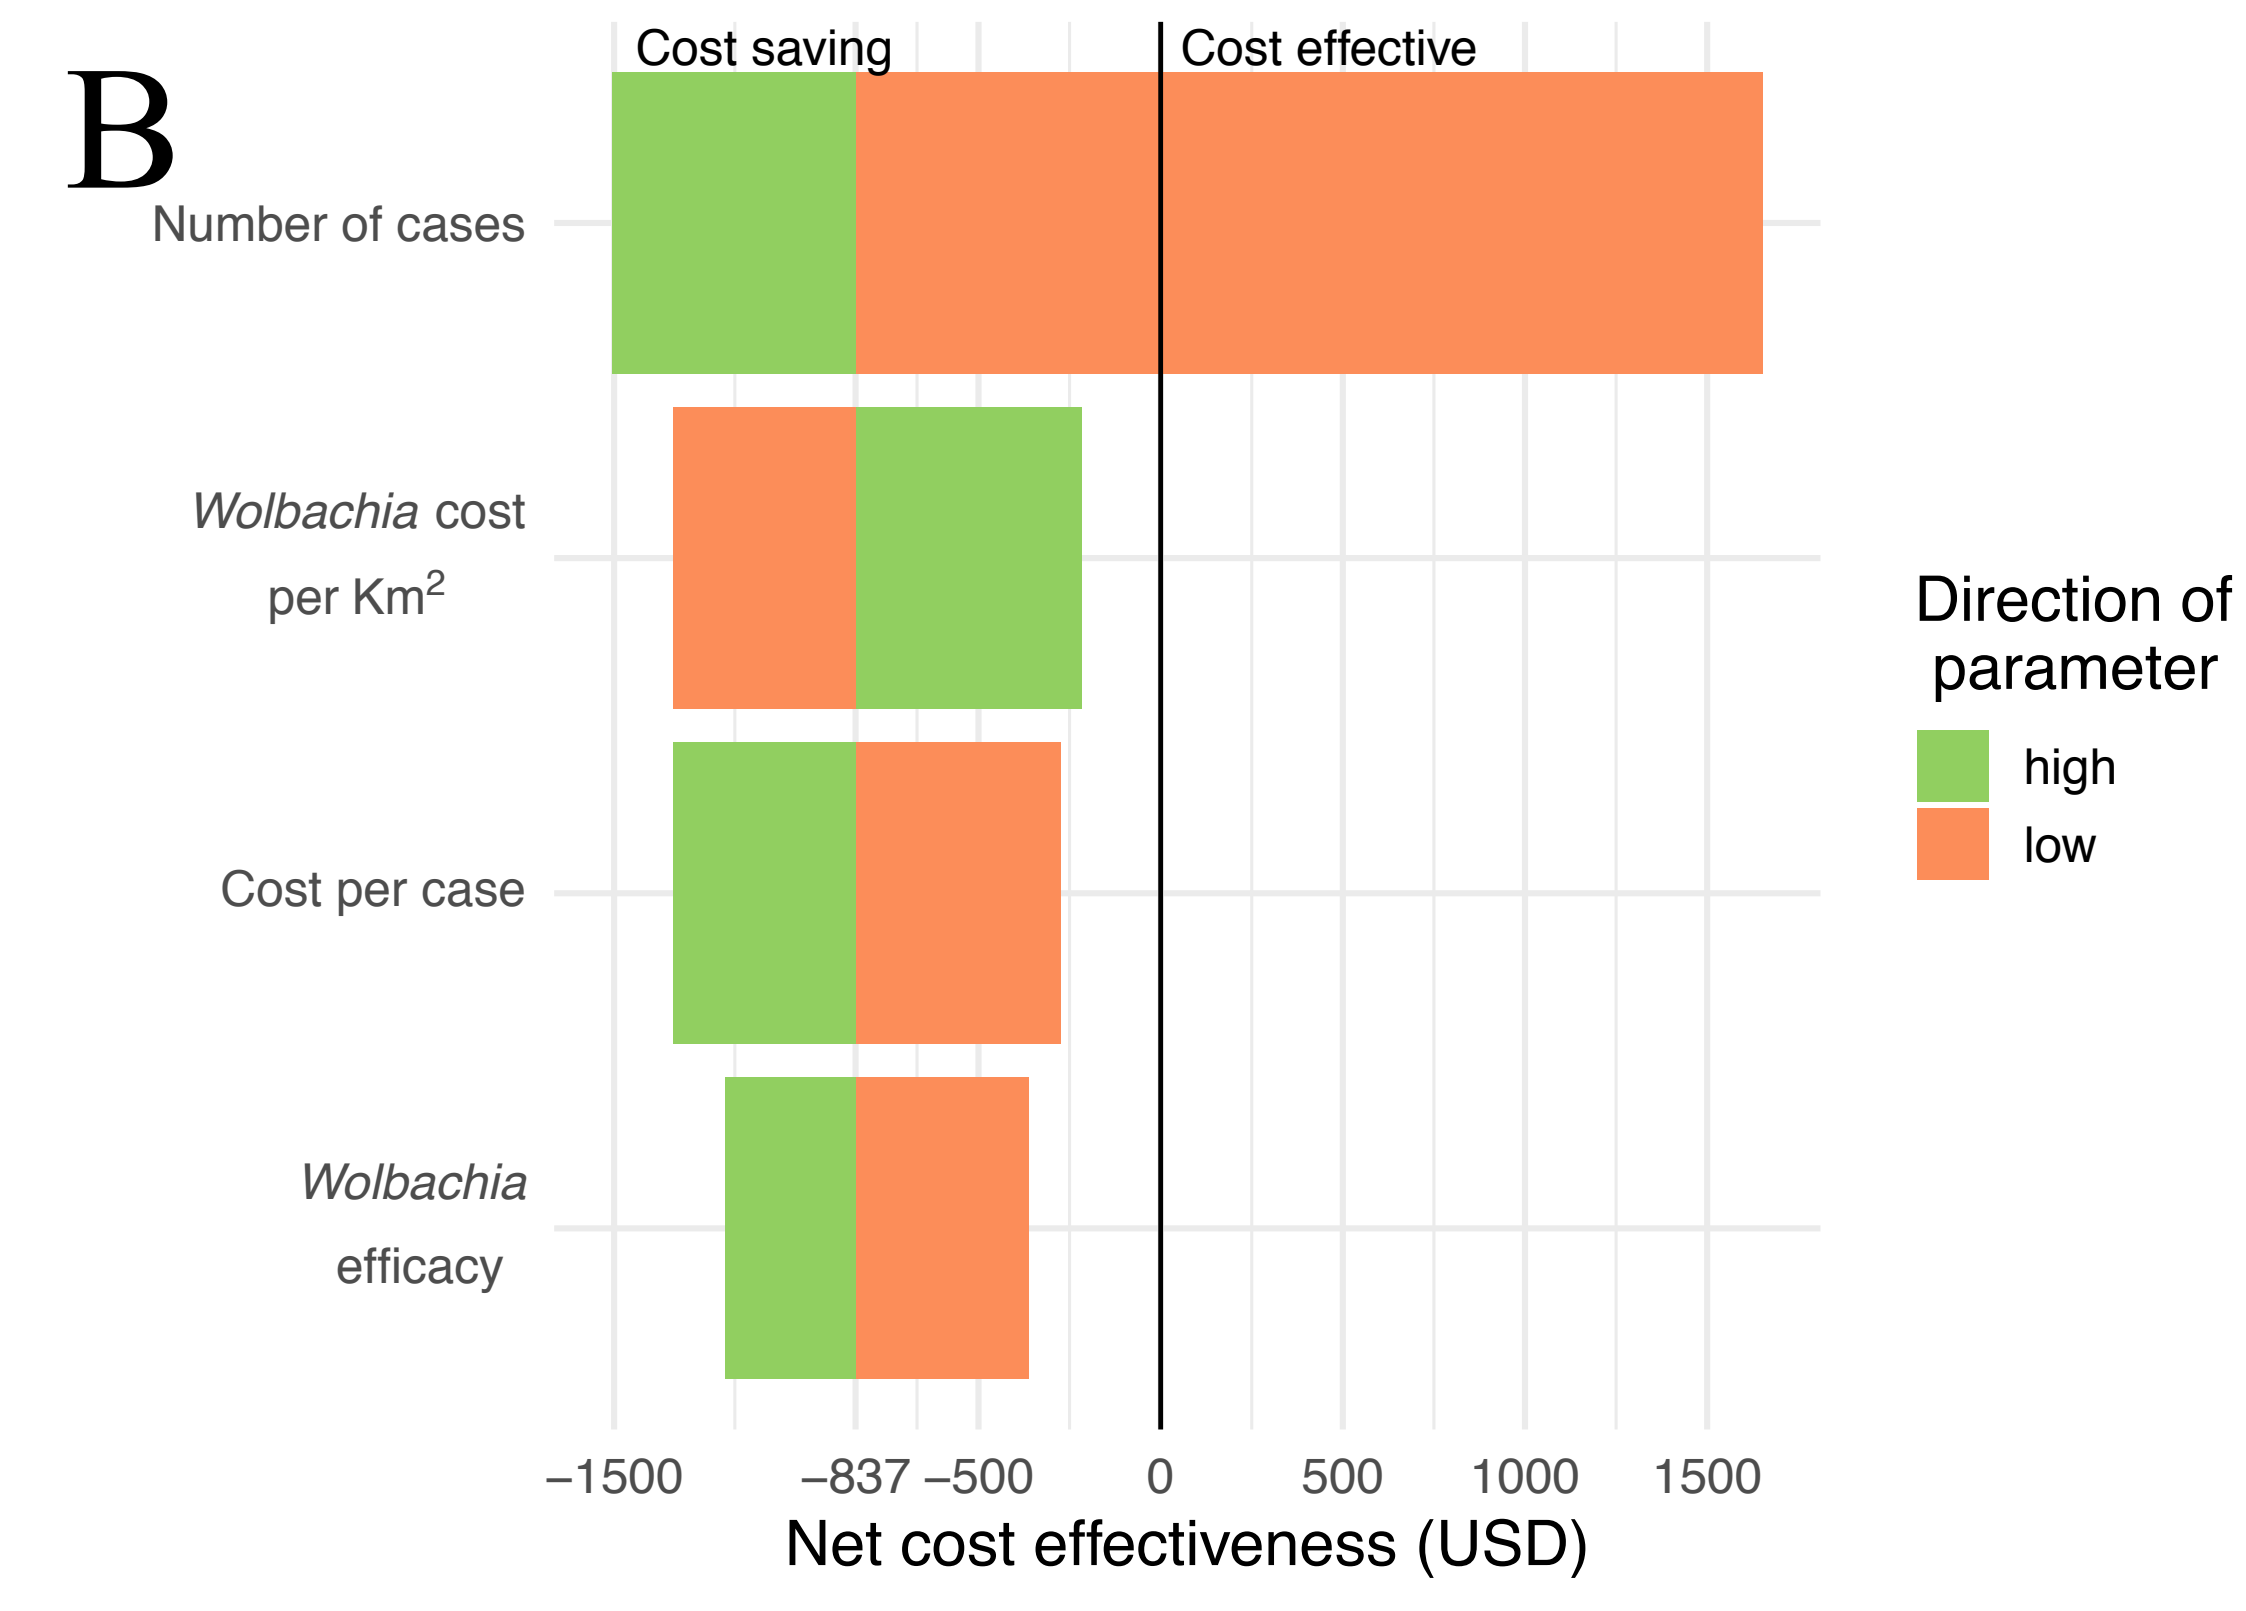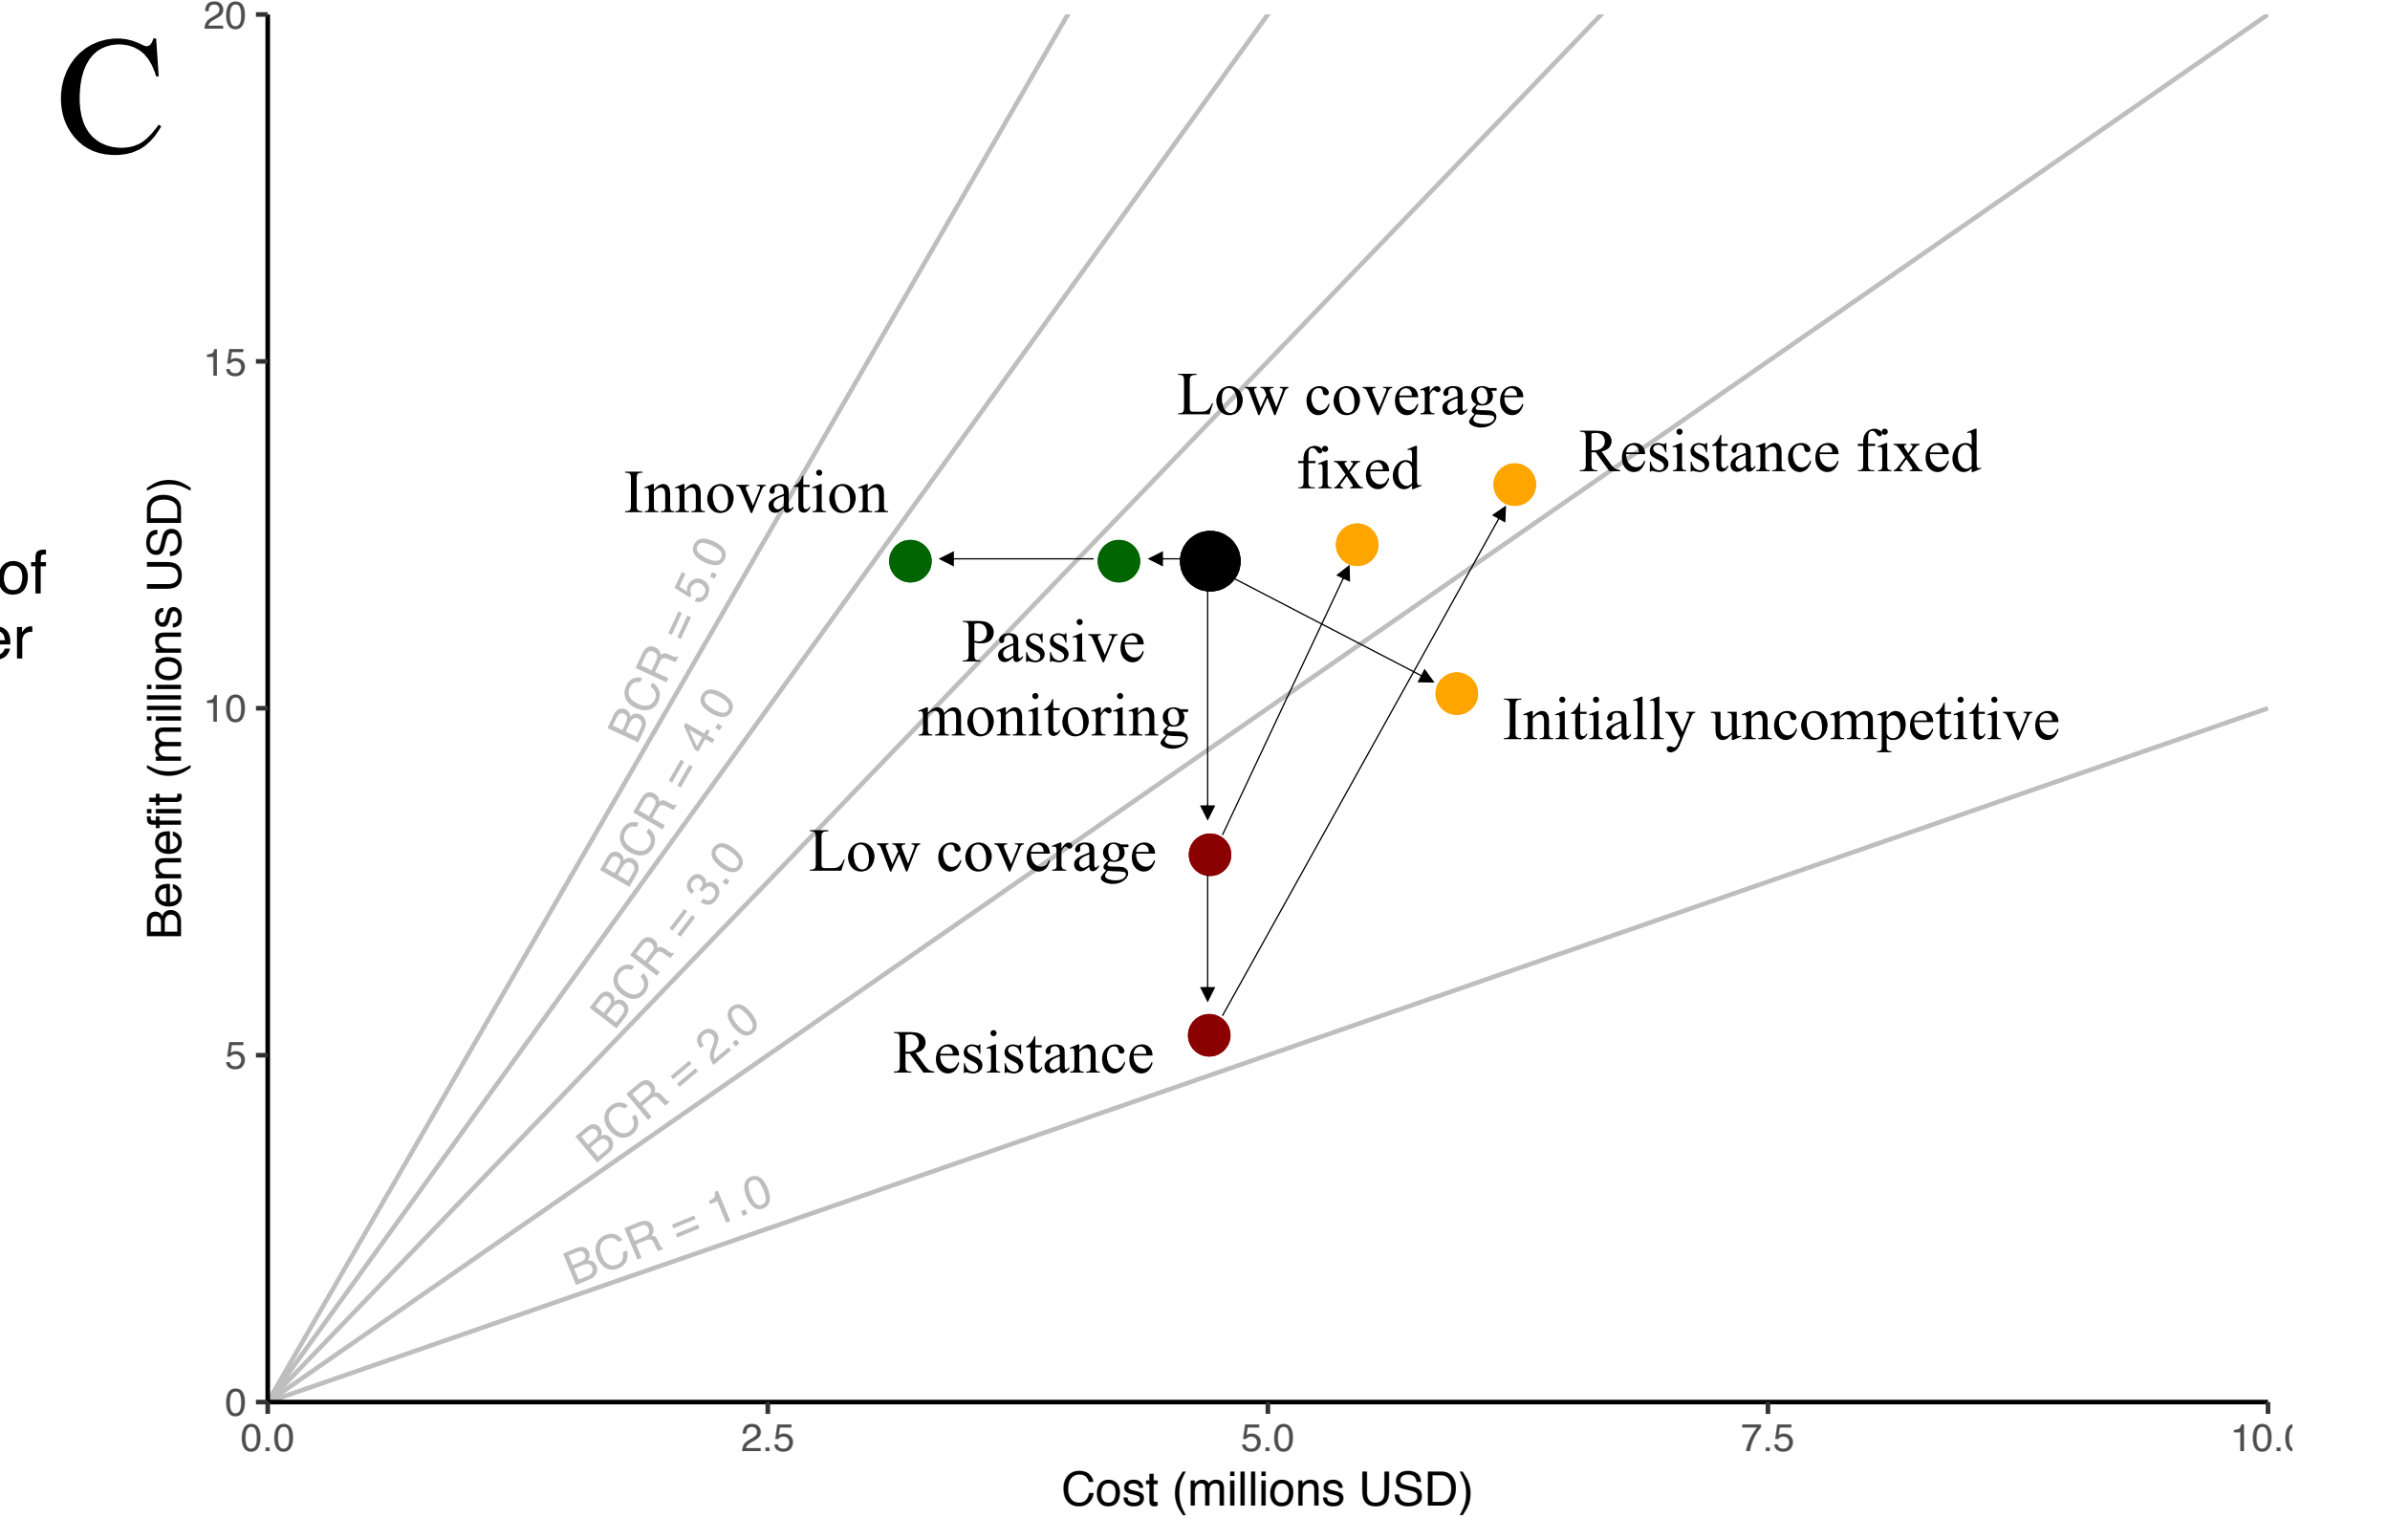

Source: https://medrxiv.org/content/10.1101/2020.01.11.20017186v1.full.pdf
